# Supplementary material for: Dissecting the Genetic Architecture of Shoot Growth in Carrot (Daucus carota L.) Using a Diallel Mating Design
Source: PubMed Central journal article supplement (PMC5919754; doi:10.1534/g3.117.300235), 2017-11-29
Supplement: 411FileS1.pdf [file 411FileS1.pdf]

# File S1

## Turner et al: Supplementary Results

|          |                                                      |           |
|----------|------------------------------------------------------|-----------|
| <b>1</b> | <b>Parental lines</b>                                | <b>4</b>  |
| 1.1      | Parental means . . . . .                             | 5         |
| <b>2</b> | <b>Multiple imputation</b>                           | <b>6</b>  |
| 2.1      | Incidence of missing data . . . . .                  | 6         |
| 2.2      | Convergence of MCMC chains . . . . .                 | 7         |
| 2.3      | Observed and imputed values . . . . .                | 8         |
| 2.4      | Observed and imputed values by year . . . . .        | 9         |
| 2.5      | Pooled ANOVA results . . . . .                       | 10        |
| <b>3</b> | <b>Midseason height (80 DAP)</b>                     | <b>13</b> |
| 3.1      | GGE biplot . . . . .                                 | 13        |
| 3.2      | Observed and predicted values . . . . .              | 14        |
| 3.3      | HPD intervals for inheritance classes . . . . .      | 15        |
| 3.4      | HPD intervals for fixed and random effects . . . . . | 15        |
| 3.5      | Degree of dominance . . . . .                        | 16        |
| 3.6      | GxE . . . . .                                        | 17        |
| 3.6.1    | GCA x environment interactions . . . . .             | 17        |
| 3.6.2    | SCA x environment interactions . . . . .             | 18        |
| 3.6.3    | Rankings by environment . . . . .                    | 19        |
| <b>4</b> | <b>Height (130 DAP)</b>                              | <b>20</b> |
| 4.1      | GGE biplot . . . . .                                 | 20        |
| 4.2      | Observed and predicted values . . . . .              | 21        |
| 4.3      | HPD intervals for inheritance classes . . . . .      | 22        |
| 4.4      | HPD intervals for fixed and random effects . . . . . | 22        |
| 4.5      | Degree of dominance . . . . .                        | 23        |
| 4.6      | GxE . . . . .                                        | 24        |
| 4.6.1    | GCA x environment interactions . . . . .             | 24        |
| 4.6.2    | Reciprocal x environment interactions . . . . .      | 25        |
| 4.6.3    | Rankings by environment . . . . .                    | 26        |

---

|          |                                                      |           |
|----------|------------------------------------------------------|-----------|
| <b>5</b> | <b>Midseason width (80 DAP)</b>                      | <b>27</b> |
| 5.1      | GGE biplot . . . . .                                 | 27        |
| 5.2      | Observed and predicted values . . . . .              | 28        |
| 5.3      | HPD intervals for inheritance classes . . . . .      | 29        |
| 5.4      | HPD intervals for fixed and random effects . . . . . | 29        |
| 5.5      | Degree of dominance . . . . .                        | 30        |
| 5.6      | GxE . . . . .                                        | 31        |
| 5.6.1    | Rankings by environment . . . . .                    | 31        |
| <b>6</b> | <b>Width (130 DAP)</b>                               | <b>32</b> |
| 6.1      | GGE biplot . . . . .                                 | 32        |
| 6.2      | Observed and predicted values . . . . .              | 33        |
| 6.3      | HPD intervals for inheritance classes . . . . .      | 34        |
| 6.4      | HPD intervals for fixed and random effects . . . . . | 34        |
| 6.5      | Degree of dominance . . . . .                        | 35        |
| 6.6      | GxE . . . . .                                        | 36        |
| 6.6.1    | Rankings by environment . . . . .                    | 36        |
| <b>7</b> | <b>Shoot biomass (fresh)</b>                         | <b>37</b> |
| 7.1      | GGE biplot . . . . .                                 | 37        |
| 7.2      | Observed and predicted values . . . . .              | 38        |
| 7.3      | HPD intervals for inheritance classes . . . . .      | 39        |
| 7.4      | HPD intervals for fixed and random effects . . . . . | 39        |
| 7.5      | Degree of dominance . . . . .                        | 40        |
| 7.6      | GxE . . . . .                                        | 41        |
| 7.6.1    | GCA x environment interactions . . . . .             | 41        |
| 7.6.2    | SCA x environment interactions . . . . .             | 42        |
| 7.6.3    | Reciprocal x environment interactions . . . . .      | 43        |
| 7.6.4    | Rankings by environment . . . . .                    | 44        |
| <b>8</b> | <b>Shoot biomass (dry)</b>                           | <b>45</b> |
| 8.1      | GGE biplot . . . . .                                 | 45        |
| 8.2      | Observed and predicted values . . . . .              | 46        |
| 8.3      | HPD intervals for inheritance classes . . . . .      | 47        |
| 8.4      | HPD intervals for fixed and random effects . . . . . | 47        |
| 8.5      | Degree of dominance . . . . .                        | 48        |
| 8.6      | GxE . . . . .                                        | 49        |
| 8.6.1    | GCA x environment interactions . . . . .             | 49        |
| 8.6.2    | SCA x environment interactions . . . . .             | 50        |
| 8.6.3    | Rankings by environment . . . . .                    | 51        |

|           |                                                      |           |
|-----------|------------------------------------------------------|-----------|
| <b>9</b>  | <b>Root biomass (fresh)</b>                          | <b>52</b> |
| 9.1       | GGE biplot . . . . .                                 | 52        |
| 9.2       | Observed and predicted values . . . . .              | 53        |
| 9.3       | HPD intervals for inheritance classes . . . . .      | 54        |
| 9.4       | HPD intervals for fixed and random effects . . . . . | 54        |
| 9.5       | Degree of dominance . . . . .                        | 55        |
| 9.6       | GxE . . . . .                                        | 56        |
| 9.6.1     | Rankings by environment . . . . .                    | 56        |
| <b>10</b> | <b>Root biomass (dry)</b>                            | <b>57</b> |
| 10.1      | GGE biplot . . . . .                                 | 57        |
| 10.2      | Observed and predicted values . . . . .              | 58        |
| 10.3      | HPD intervals for inheritance classes . . . . .      | 59        |
| 10.4      | HPD intervals for fixed and random effects . . . . . | 59        |
| 10.5      | Degree of dominance . . . . .                        | 60        |
| 10.6      | GxE . . . . .                                        | 61        |
| 10.6.1    | Rankings by environment . . . . .                    | 61        |
| <b>11</b> | <b>Shoot:root ratio</b>                              | <b>62</b> |
| 11.1      | GGE biplot . . . . .                                 | 62        |
| 11.2      | Observed and predicted values . . . . .              | 63        |
| 11.3      | HPD intervals for inheritance classes . . . . .      | 64        |
| 11.4      | HPD intervals for fixed and random effects . . . . . | 64        |
| 11.5      | Degree of dominance . . . . .                        | 65        |
| 11.6      | GxE . . . . .                                        | 66        |
| 11.6.1    | GCA x environment interactions . . . . .             | 66        |
| 11.6.2    | SCA x environment interactions . . . . .             | 67        |
| 11.6.3    | Rankings by environment . . . . .                    | 68        |

# 1. Parental lines

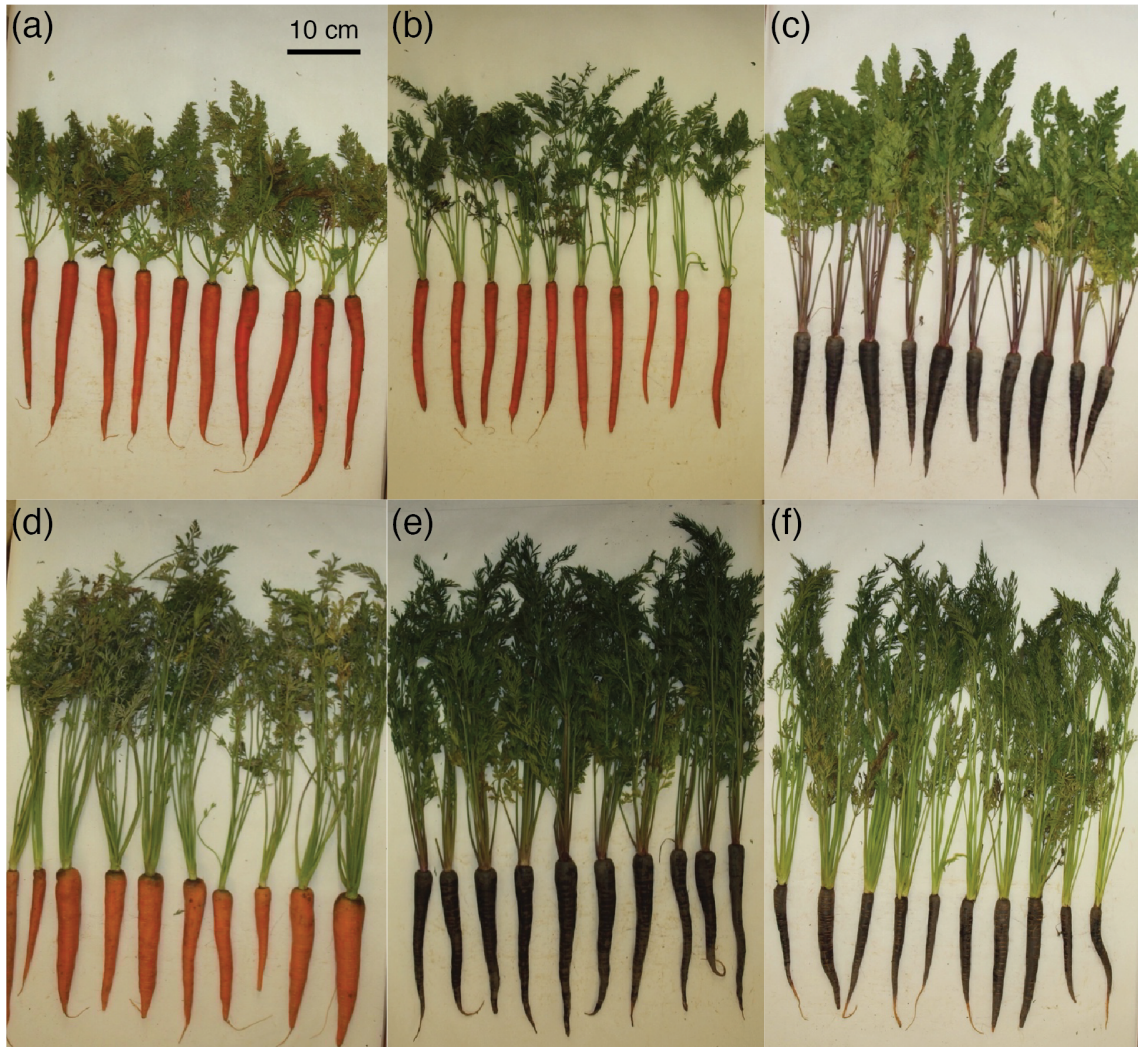

**Figure S1:** Carrot inbred lines used as parents in this study. (a) L6038, (b) L7550, (c) P0159, (d) Nbh2189, (e) P6139, (f) B7262.



## 1.1 Parental means

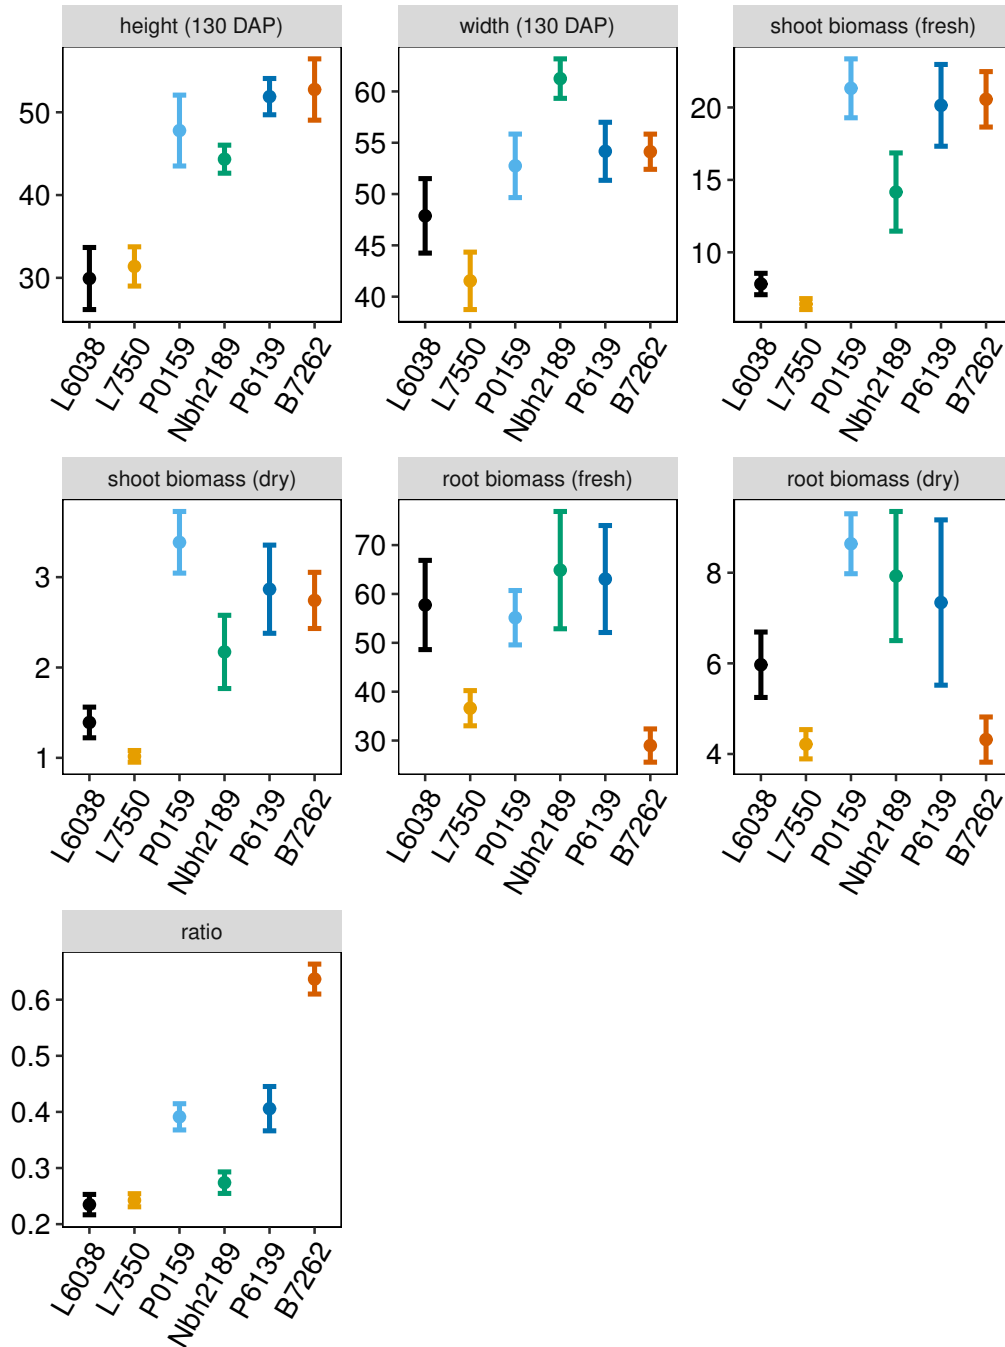

**Figure S2:** Variation among parental lines for selected phenotypes. Values are means  $\pm$  95% confidence intervals.

## 2. Multiple imputation

### 2.1 Incidence of missing data

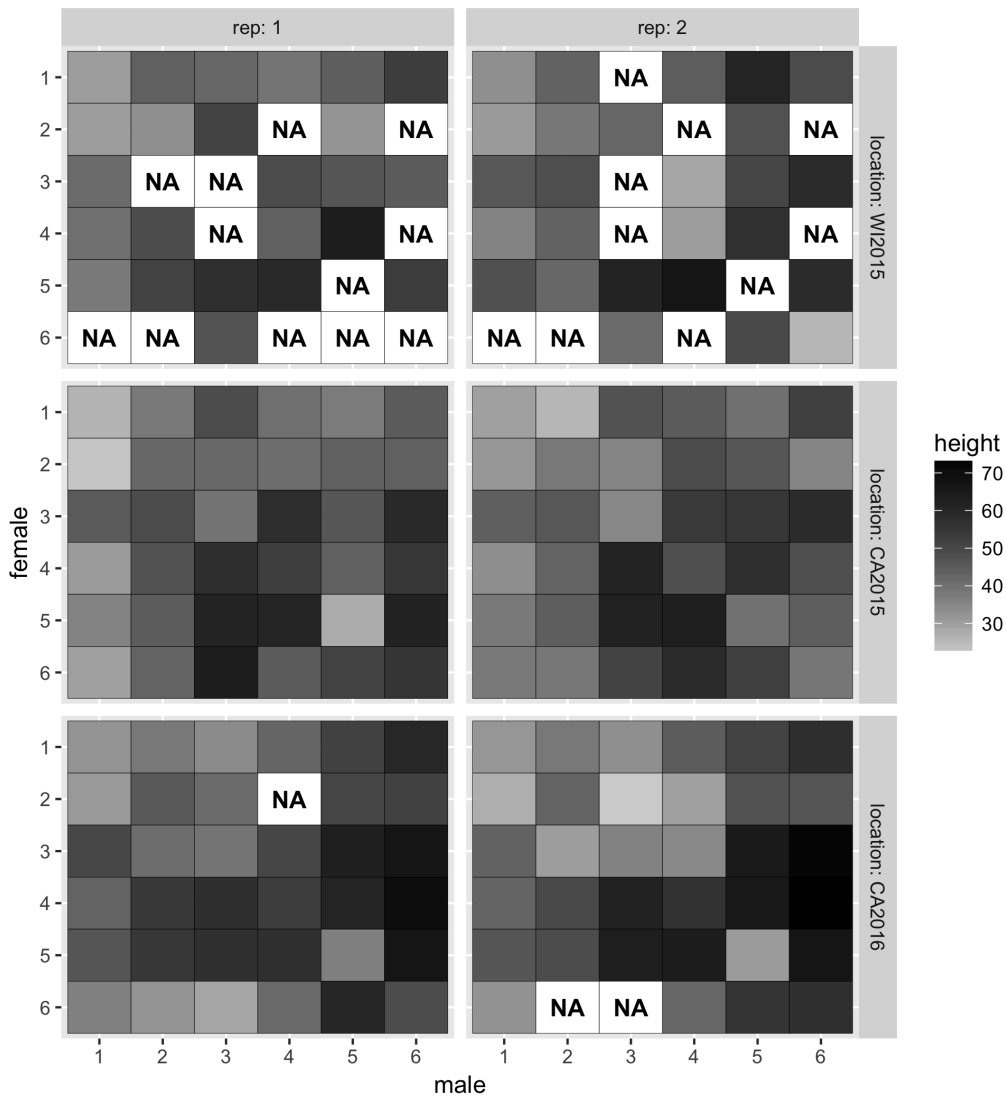

**Figure S3:** Incidence of missing data by replication and year for canopy height (130 DAP). Key: 1 = L6038, 2 = L7550, 3 = P0159, 4 = Nbh2189, 5 = P6139, 6 = B7262.

## 2.2 Convergence of MCMC chains

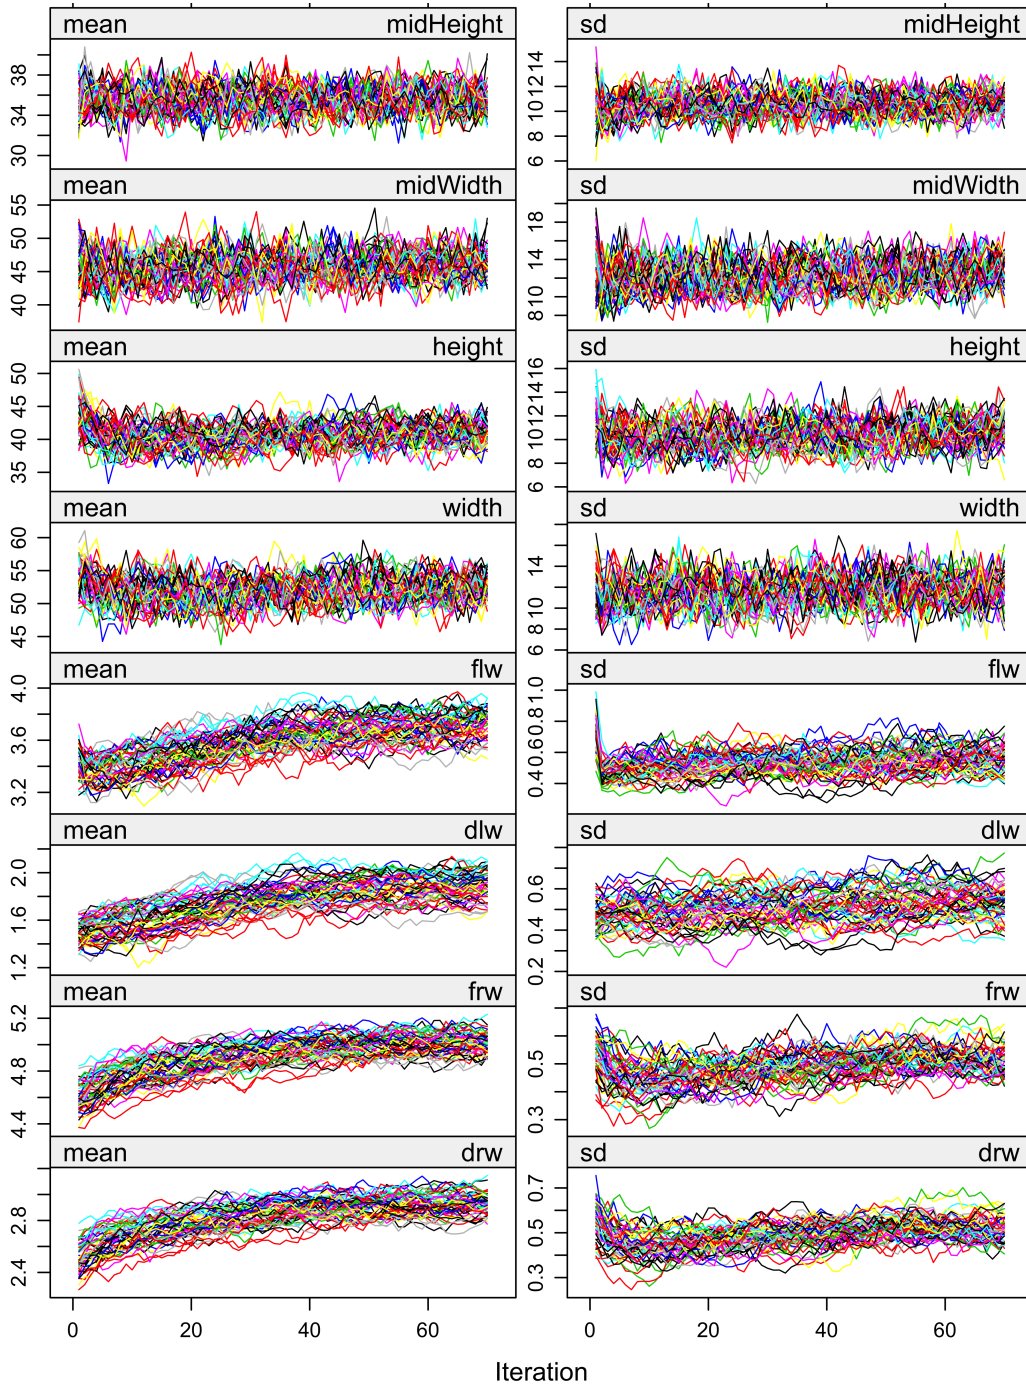

**Figure S4:** Convergence of imputed Markov chain Monte Carlo (MCMC) chains for all phenotypes. Key: flw = fresh shoot biomass, dlw = dry shoot biomass, frw = fresh root biomass, drw = dry root biomass.

## 2.3 Observed and imputed values

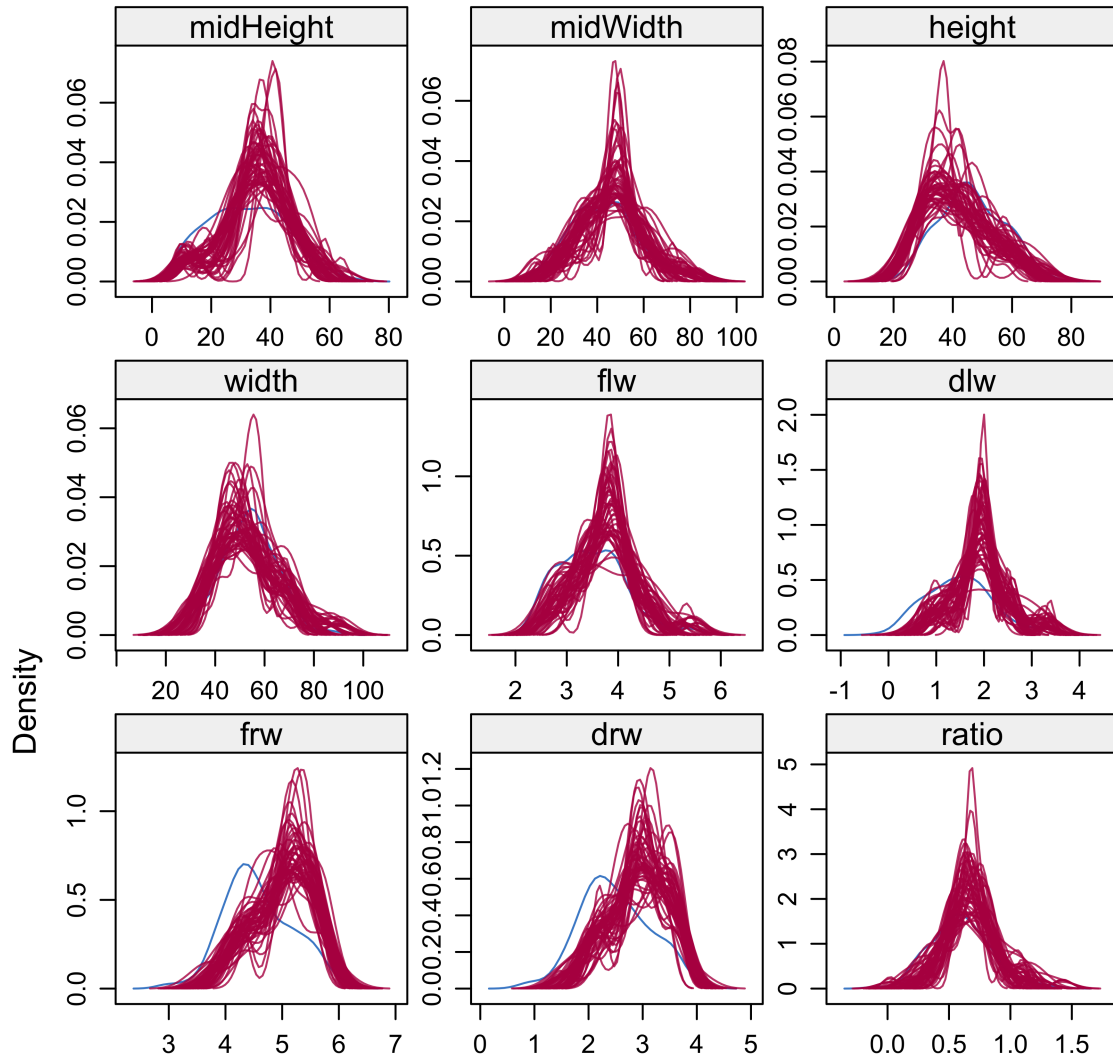

**Figure S5:** Distributions of observed (blue) and imputed (pink) values for all phenotypes. Key: flw = fresh shoot biomass, dlw = dry shoot biomass, frw = fresh root biomass, drw = dry root biomass.

## 2.4 Observed and imputed values by year

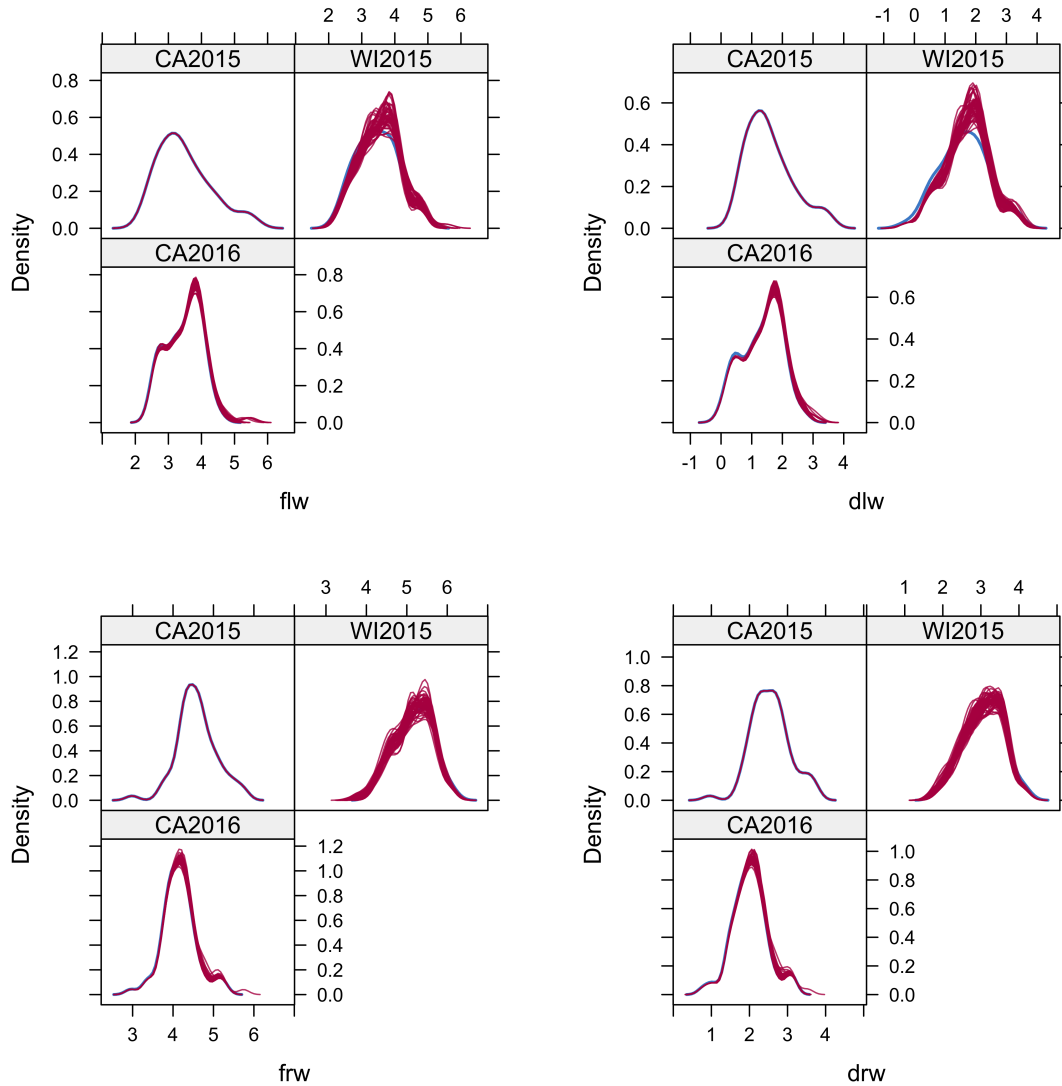

**Figure S6:** Distributions of observed (blue) and imputed (pink) values for selected traits by year. Key: flw = fresh shoot biomass, dlw = dry shoot biomass, frw = fresh root biomass, drw = dry root biomass.

## 2.5 Pooled ANOVA results

**Table S1:** Pooled results of Griffing’s ANOVA (Method I, Model I) for multiply imputed data of carrot growth traits. Values include mean squares, critical F-values, corrected numerator degrees of freedom (rN), corrected denominator degrees of freedom (rD), and corresponding p-values.

| Phenotype       | Source           | MS       | F-value | rN    | rD    | P-value  |
|-----------------|------------------|----------|---------|-------|-------|----------|
| height (80 DAP) | genotype         | 331.34   | 21.56   | 33.78 | 94.12 | 2.44E-31 |
|                 | gca              | 516.06   | 33.42   | 4.88  | 94.12 | 3.12E-19 |
|                 | sca              | 393.69   | 25.48   | 14.09 | 94.12 | 4.90E-26 |
|                 | recip            | 207.42   | 13.44   | 14.29 | 94.12 | 5.36E-17 |
|                 | year             | 10794.60 | 702.62  | 1.99  | 94.12 | 2.95E-57 |
|                 | gxe              | 25.91    | 1.68    | 62.74 | 94.12 | 1.09E-02 |
|                 | gcaxe            | 39.72    | 2.53    | 8.77  | 94.12 | 1.29E-02 |
|                 | scaxe            | 25.26    | 1.63    | 26.49 | 94.12 | 4.50E-02 |
|                 | recipxe          | 21.96    | 1.42    | 26.32 | 94.12 | 1.13E-01 |
|                 | rep:year         | 24.00    | 1.32    | 1.43  | 94.12 | 2.65E-01 |
|                 | residual         | 15.38    | NA      | NA    | NA    | NA       |
|                 | height (130 DAP) | genotype | 489.30  | 15.29 | 34.20 | 81.71    |
| gca             |                  | 1488.95  | 46.49   | 4.97  | 81.71 | 1.96E-22 |
| sca             |                  | 376.33   | 11.71   | 14.32 | 81.71 | 2.16E-14 |
| recip           |                  | 269.07   | 8.34    | 13.83 | 81.71 | 1.01E-10 |
| year            |                  | 268.70   | 7.96    | 1.78  | 81.71 | 1.10E-03 |
| gxe             |                  | 68.48    | 2.14    | 62.81 | 81.71 | 6.62E-04 |
| gcaxe           |                  | 134.49   | 4.12    | 8.89  | 81.71 | 2.23E-04 |
| scaxe           |                  | 43.07    | 1.33    | 24.82 | 81.71 | 1.70E-01 |
| recipxe         |                  | 71.88    | 2.23    | 26.85 | 81.71 | 3.02E-03 |
| rep:year        |                  | 12.49    | 0.29    | 1.14  | 81.71 | 6.19E-01 |
| residual        |                  | 32.14    | NA      | NA    | NA    | NA       |
| width (80 DAP)  |                  | genotype | 353.57  | 7.79  | 33.31 | 90.75    |
|                 | gca              | 363.35   | 7.92    | 4.74  | 90.75 | 4.76E-06 |
|                 | sca              | 362.43   | 7.94    | 14.05 | 90.75 | 9.63E-11 |
|                 | recip            | 341.46   | 7.49    | 14.15 | 90.75 | 3.28E-10 |
|                 | year             | 11668.22 | 257.25  | 1.99  | 90.75 | 4.63E-38 |
|                 | gxe              | 55.60    | 1.22    | 58.44 | 90.75 | 1.94E-01 |
|                 | gcaxe            | 55.63    | 1.17    | 7.45  | 90.75 | 3.29E-01 |
|                 | scaxe            | 36.82    | 0.79    | 20.52 | 90.75 | 7.24E-01 |
|                 | recipxe          | 74.37    | 1.62    | 24.50 | 90.75 | 5.28E-02 |
|                 | rep:year         | 56.44    | 0.99    | 1.21  | 90.75 | 3.39E-01 |
|                 | residual         | 45.39    | NA      | NA    | NA    | NA       |

Continued on next page



Table S1 – continued from previous page

| Phenotype             | Source   | MS      | F-value | rN    | rD    | P-value  |
|-----------------------|----------|---------|---------|-------|-------|----------|
| width (130 DAP)       | genotype | 433.77  | 8.16    | 32.89 | 90.48 | 1.13E-15 |
|                       | gca      | 1024.37 | 19.22   | 4.91  | 90.48 | 7.41E-13 |
|                       | sca      | 435.66  | 8.16    | 14.12 | 90.48 | 5.04E-11 |
|                       | recip    | 235.02  | 4.37    | 13.19 | 90.48 | 1.02E-05 |
|                       | year     | 944.08  | 17.26   | 1.88  | 90.48 | 7.78E-07 |
|                       | gxe      | 64.74   | 1.21    | 58.34 | 90.48 | 2.01E-01 |
|                       | gcaxe    | 110.75  | 2.03    | 8.44  | 90.48 | 4.85E-02 |
|                       | scaxe    | 50.95   | 0.95    | 25.05 | 90.48 | 5.41E-01 |
|                       | recipxe  | 63.20   | 1.18    | 25.31 | 90.48 | 2.80E-01 |
|                       | rep:year | 106.03  | 1.98    | 1.96  | 90.48 | 1.45E-01 |
|                       | residual | 53.17   | NA      | NA    | NA    | NA       |
| shoot biomass (fresh) | genotype | 1.80    | 15.67   | 33.26 | 83.96 | 4.99E-24 |
|                       | gca      | 7.27    | 63.32   | 4.96  | 83.96 | 5.99E-27 |
|                       | sca      | 0.95    | 8.18    | 13.81 | 83.96 | 1.22E-10 |
|                       | recip    | 0.83    | 7.13    | 13.11 | 83.96 | 3.61E-09 |
|                       | year     | 0.11    | 0.05    | 0.06  | 83.96 | 1.61E-01 |
|                       | gxe      | 0.26    | 2.27    | 58.11 | 83.96 | 3.00E-04 |
|                       | gcaxe    | 0.45    | 3.88    | 9.05  | 83.96 | 3.69E-04 |
|                       | scaxe    | 0.26    | 2.29    | 28.00 | 83.96 | 1.94E-03 |
|                       | recipxe  | 0.19    | 1.67    | 23.85 | 83.96 | 4.50E-02 |
|                       | rep:year | 0.10    | 0.77    | 1.77  | 83.96 | 4.51E-01 |
|                       | residual | 0.12    | NA      | NA    | NA    | NA       |
| shoot biomass (dry)   | genotype | 2.13    | 15.35   | 33.41 | 93.50 | 1.93E-25 |
|                       | gca      | 8.55    | 61.63   | 4.96  | 93.50 | 5.33E-28 |
|                       | sca      | 1.21    | 8.70    | 13.87 | 93.50 | 1.07E-11 |
|                       | recip    | 0.91    | 6.45    | 13.33 | 93.50 | 1.11E-08 |
|                       | year     | 2.06    | 14.22   | 1.82  | 93.50 | 8.18E-06 |
|                       | gxe      | 0.28    | 1.98    | 58.09 | 93.50 | 1.61E-03 |
|                       | gcaxe    | 0.40    | 2.80    | 8.87  | 93.50 | 6.14E-03 |
|                       | scaxe    | 0.31    | 2.25    | 27.50 | 93.50 | 2.06E-03 |
|                       | recipxe  | 0.20    | 1.40    | 23.10 | 93.50 | 1.33E-01 |
|                       | rep:year | 0.12    | 0.69    | 1.44  | 93.50 | 4.57E-01 |
|                       | residual | 0.14    | NA      | NA    | NA    | NA       |

Continued on next page

Table S1 – continued from previous page

| Phenotype            | Source   | MS    | F-value | rN    | rD    | P-value  |
|----------------------|----------|-------|---------|-------|-------|----------|
| root biomass (fresh) | genotype | 0.76  | 8.73    | 33.57 | 94.71 | 4.15E-17 |
|                      | gca      | 1.13  | 12.99   | 4.81  | 94.71 | 2.02E-09 |
|                      | sca      | 1.11  | 12.76   | 14.51 | 94.71 | 1.74E-16 |
|                      | recip    | 0.28  | 3.18    | 13.03 | 94.71 | 5.45E-04 |
|                      | year     | 17.80 | 205.50  | 1.99  | 94.71 | 4.18E-35 |
|                      | gxe      | 0.12  | 1.44    | 62.13 | 94.71 | 5.37E-02 |
|                      | gcaxe    | 0.21  | 2.40    | 9.18  | 94.71 | 1.64E-02 |
|                      | scaxe    | 0.14  | 1.55    | 25.69 | 94.71 | 6.63E-02 |
|                      | recipxe  | 0.09  | 0.98    | 24.86 | 94.71 | 4.95E-01 |
|                      | rep:year | 0.14  | 1.53    | 1.88  | 94.71 | 2.22E-01 |
|                      | residual | 0.09  | NA      | NA    | NA    | NA       |
| root biomass (dry)   | genotype | 0.91  | 9.26    | 33.49 | 95.15 | 5.75E-18 |
|                      | gca      | 1.74  | 17.55   | 4.88  | 95.15 | 3.99E-12 |
|                      | sca      | 1.30  | 13.22   | 14.44 | 95.15 | 6.11E-17 |
|                      | recip    | 0.24  | 2.43    | 12.18 | 95.15 | 8.24E-03 |
|                      | year     | 19.71 | 200.19  | 1.99  | 95.15 | 9.40E-35 |
|                      | gxe      | 0.12  | 1.26    | 59.40 | 95.15 | 1.54E-01 |
|                      | gcaxe    | 0.20  | 1.97    | 9.01  | 95.15 | 5.11E-02 |
|                      | scaxe    | 0.13  | 1.33    | 25.13 | 95.15 | 1.66E-01 |
|                      | recipxe  | 0.09  | 0.94    | 24.92 | 95.15 | 5.53E-01 |
|                      | rep:year | 0.15  | 1.41    | 1.80  | 95.15 | 2.48E-01 |
|                      | residual | 0.10  | NA      | NA    | NA    | NA       |
| shoot:root ratio     | genotype | 0.24  | 17.39   | 32.86 | 82.36 | 3.51E-25 |
|                      | gca      | 1.27  | 93.46   | 4.95  | 82.36 | 2.47E-32 |
|                      | sca      | 0.06  | 4.19    | 12.68 | 82.36 | 2.94E-05 |
|                      | recip    | 0.07  | 5.09    | 12.96 | 82.36 | 1.61E-06 |
|                      | year     | 0.27  | 18.69   | 1.79  | 82.36 | 5.84E-07 |
|                      | gxe      | 0.04  | 2.69    | 60.59 | 82.36 | 1.64E-05 |
|                      | gcaxe    | 0.08  | 6.15    | 8.99  | 82.36 | 1.42E-06 |
|                      | scaxe    | 0.04  | 3.03    | 27.97 | 82.36 | 5.34E-05 |
|                      | recipxe  | 0.02  | 1.15    | 21.92 | 82.36 | 3.13E-01 |
|                      | rep:year | 0.01  | 0.33    | 0.67  | 82.36 | 4.82E-01 |
|                      | residual | 0.01  | NA      | NA    | NA    | NA       |

# 3. Midseason height (80 DAP)

## 3.1 GGE biplot

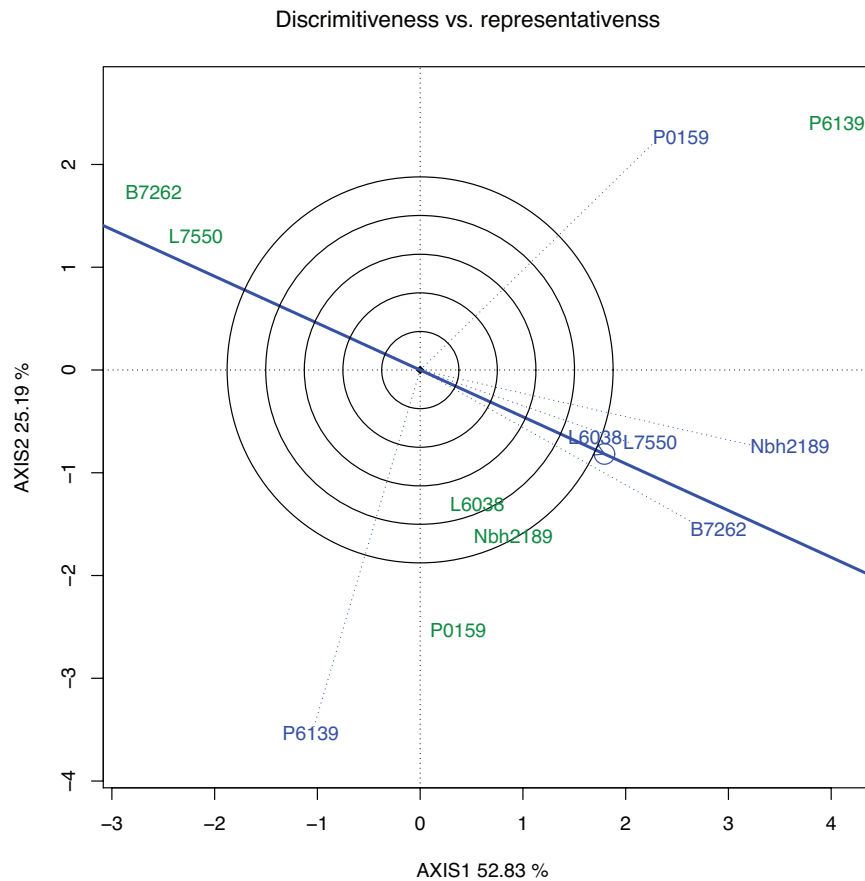

**Figure S7:** Discriminativens vs. representativens view of a biplot for canopy height at 80 days after planting. Parents treated as testers are shown in blue and as entries in green. The blue line indicates the average tester coordinate (ATC) abscissa, with the blue circle indicating the average tester score. The arrow in the circle indicates the direction of increasing GCA for the entries. Parent B7262 was both the most discriminating (had the longest vector) and was representative of other parental lines (vector was close to the ATC abscissa).

### 3.2 Observed and predicted values

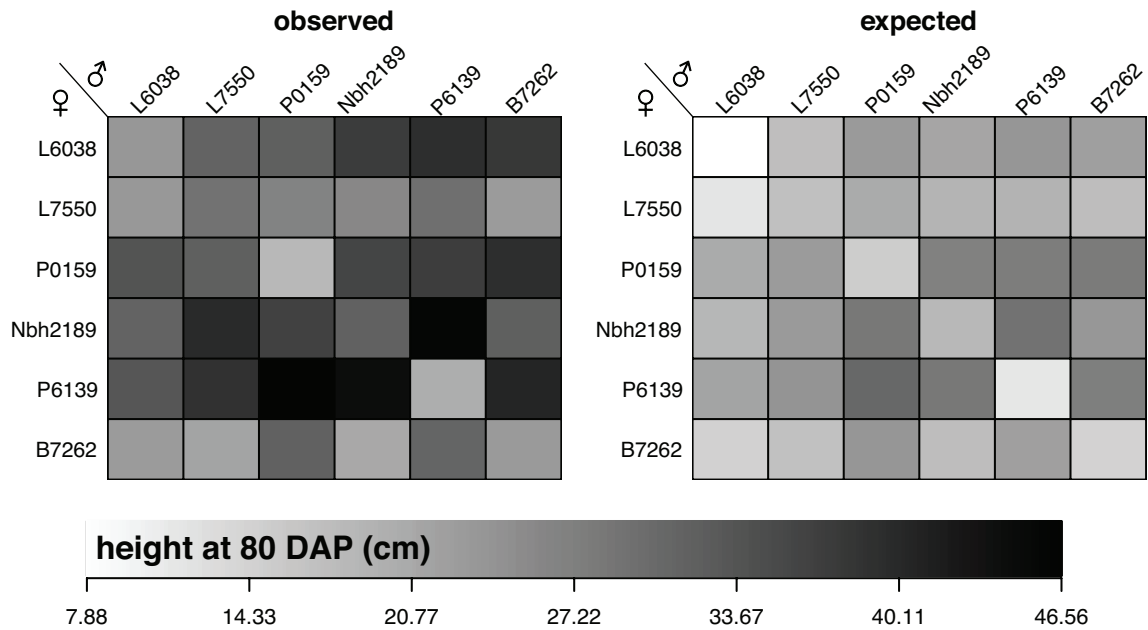

**Figure S8:** Observed (left) and predicted (right) means for height (80 DAP). Posterior predicted means on the right are the result of fitting the model in BayesDiallel to the data on the left.

### 3.3 HPD intervals for inheritance classes

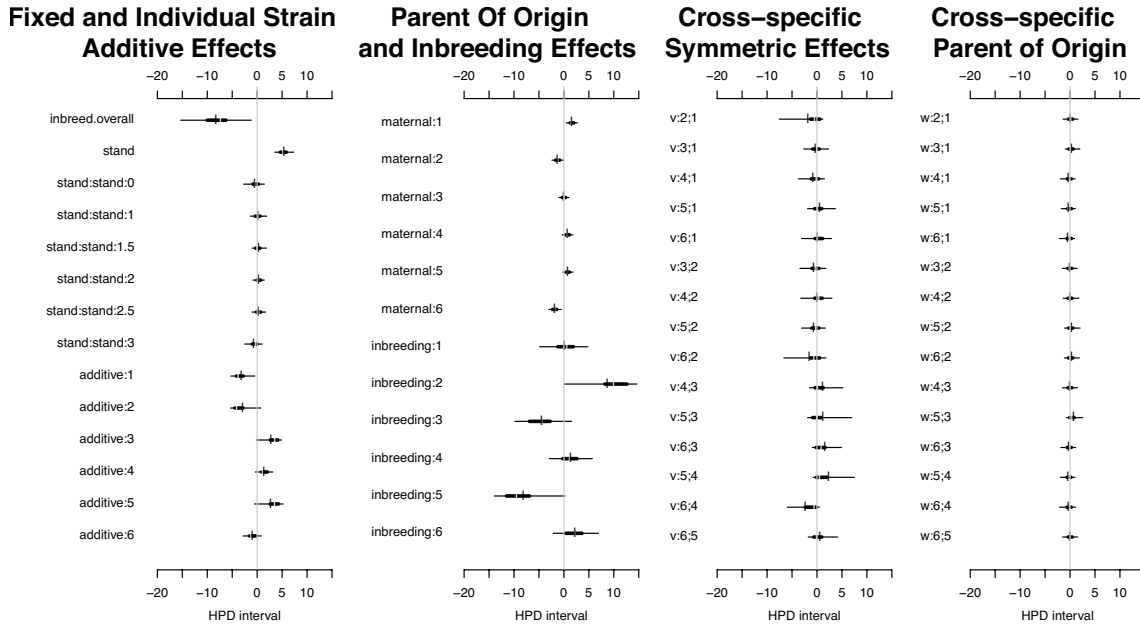

Figure S9: HPD intervals for canopy height (80 DAP; cm).

### 3.4 HPD intervals for fixed and random effects

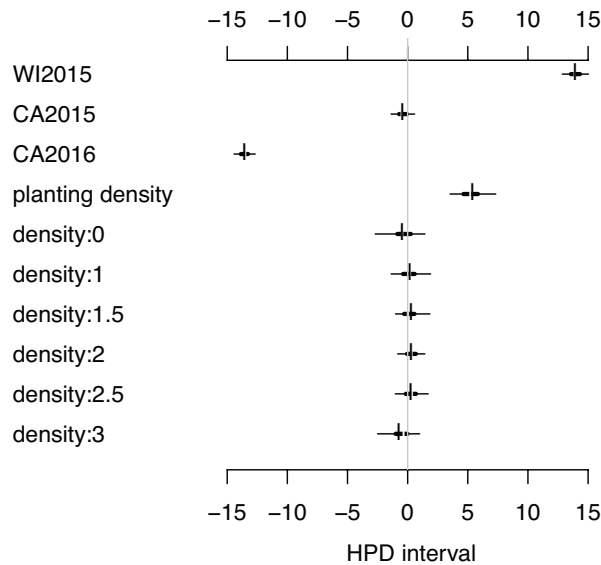

Figure S10: HPD intervals of fixed and random effects for canopy height (80 DAP; cm). Planting density ranged from 0 (low) to 3 (high).

### 3.5 Degree of dominance

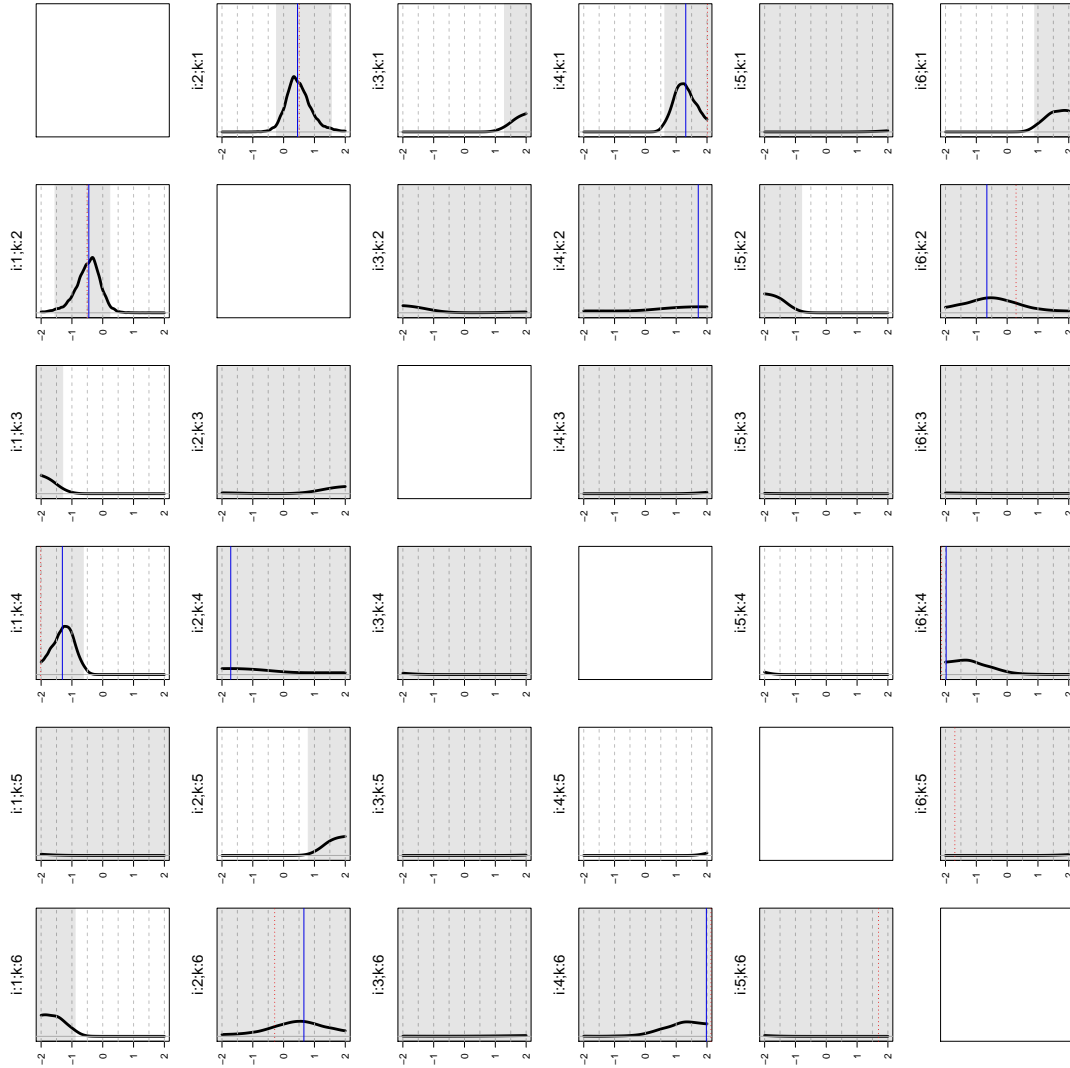

**Figure S11:** Posterior distributions of the degree of dominance for midseason height (80 DAP). Posterior means within the interval are indicated by red dotted lines and medians by blue solid lines, with 95% central quantiles shown in grey. A signal was considered strong if the mean, median, and the majority of the posterior distribution fell within the specified ranges: pseudo-underrecessive  $(-\infty, -1.5)$ , recessive  $(-1.5, -0.5)$ , additive  $(-0.5, 0.5)$ , dominant  $(0.5, 1.5)$ , pseudo-overdominant  $(1.5, \infty)$ . Key for parental lines: 1=L6038, 2=L7550, 3=P0159, 4=Nbh2189, 5=P6139, 6=B7262.



## 3.6 GxE

### 3.6.1 GCA x environment interactions

**Table S2:** GCA for plant height (80 DAP; cm) in each growing environment.

| Parent  | WI2015 | CA2015 | CA2016 |
|---------|--------|--------|--------|
| L6038   | -3.45  | -0.65  | -0.06  |
| L7550   | -2.78  | -2.9   | -2.81* |
| P0159   | 1.16   | 2.17   | -0.77  |
| Nbh2189 | 2.88   | 1.24   | 3.17*  |
| P6139   | 4.19*  | 3.52*  | 2.84*  |
| B7262   | -1.99  | -3.38* | -2.37  |

\*\*\*P $\leq$ 0.001, \*\*P $\leq$ 0.01, \*P $\leq$ 0.05

**Table S3:** Nonparametric correlations (Spearman's rho) among environments for GCA of plant height (80 DAP).

| Environment   | Spearman's rho |
|---------------|----------------|
| WI2015-CA2015 | 0.71           |
| WI2015-CA2016 | 0.60           |
| CA2015-CA2016 | 0.66           |

\*\*\*P $\leq$ 0.001, \*\*P $\leq$ 0.01, \*P $\leq$ 0.05

### 3.6.2 SCA x environment interactions

**Table S4:** SCA for plant height (80 DAP; cm) in each growing environment.

| F1 hybrids      | WI2015    | CA2015    | CA2016    |
|-----------------|-----------|-----------|-----------|
| L6038 x L7550   | 2.16      | -2.48     | -1.26     |
| L6038 x P0159   | 0.69      | 2.83      | -0.37     |
| L6038 x Nbh2189 | -1.48     | 2.3       | 2.22      |
| L6038 x P6139   | -0.01     | 3.56      | 1.44      |
| L6038 x B7262   | 1.21      | 0.91      | 4.02      |
| L7550 x P0159   | -3.06     | 2.04      | -2.22     |
| L7550 x Nbh2189 | -1.27     | 1.89      | 0.83      |
| L7550 x P6139   | -1.84     | 3.4       | -0.54     |
| L7550 x B7262   | -3.77     | -6*       | -0.54     |
| P0159 x Nbh2189 | 1.95      | 2.03      | 0.38      |
| P0159 x P6139   | 0.1       | 5.12      | 6.9*      |
| P0159 x B7262   | 2.39      | 6.89*     | 3.9       |
| Nbh2189 x P6139 | 7*        | 4.22      | 5.48      |
| Nbh2189 x B7262 | -6.11     | -5.97*    | -4.28     |
| P6139 x B7262   | -0.95     | 5.66      | 2.24      |
| Parental selfs  |           |           |           |
| L6038           | -3.5      | -7.11     | -5.11     |
| L7550           | 3.31      | 1.15      | 2.6       |
| P0159           | -13.34**  | -18.9***  | -7.12     |
| Nbh2189         | -9.31*    | -4.46     | -5.45     |
| P6139           | -20.01*** | -21.94*** | -14.58*** |
| B7262           | -6.33     | -1.49     | -2.44     |

\*\*\*P $\leq$ 0.001, \*\*P $\leq$ 0.01, \*P $\leq$ 0.05

**Table S5:** Nonparametric correlations (Spearman's rho) among environments for SCA of plant height (80 DAP).

| Environment   | Spearman's rho |
|---------------|----------------|
| WI2015-CA2015 | 0.64**         |
| WI2015-CA2016 | 0.82***        |
| CA2015-CA2016 | 0.79***        |

\*\*\*P $\leq$ 0.001, \*\*P $\leq$ 0.01, \*P $\leq$ 0.05

### 3.6.3 Rankings by environment

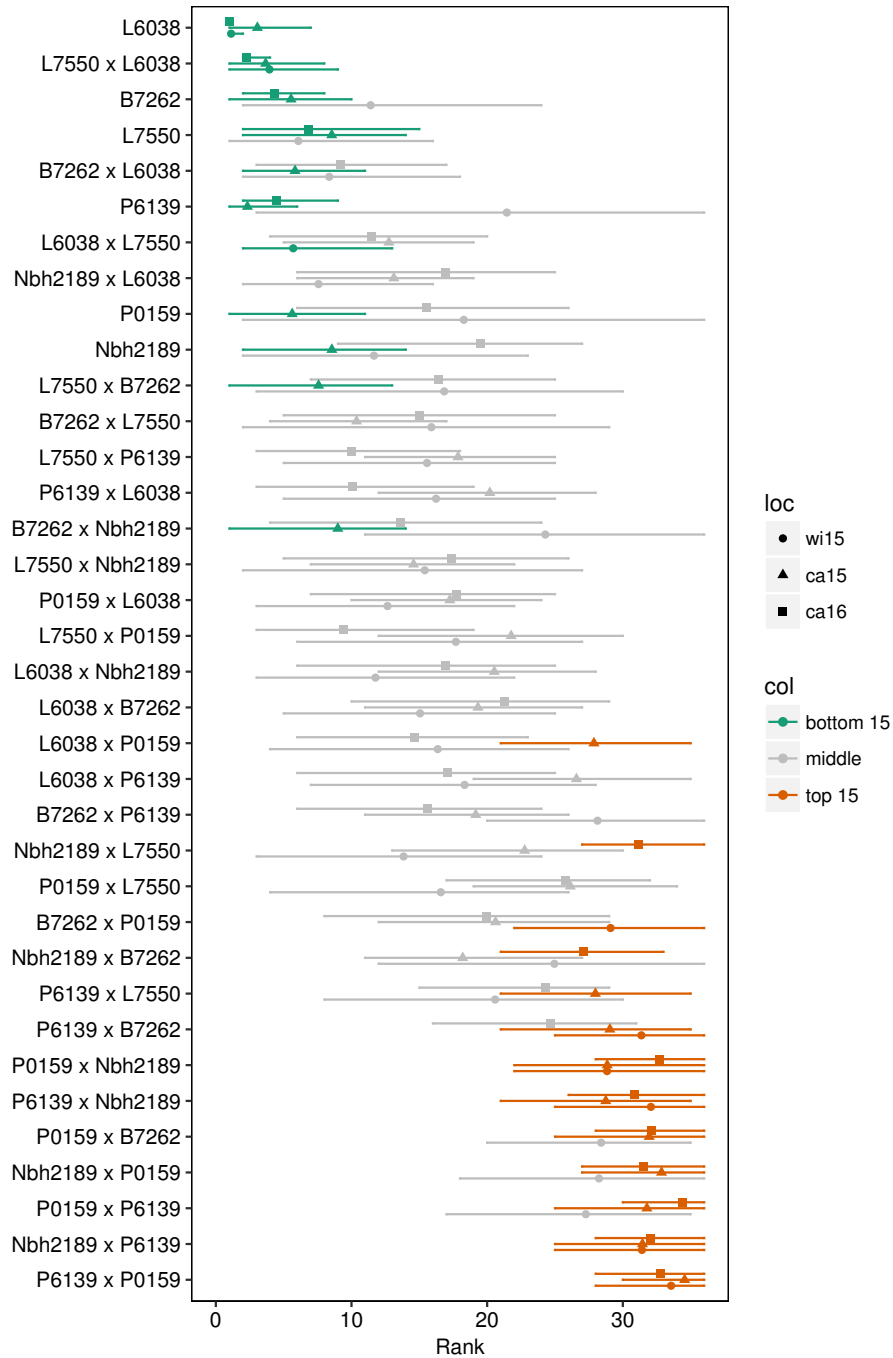

**Figure S12:** Mean values and 95% highest posterior density (HPD) intervals of hybrid rankings for canopy height (cm; 80 DAP). Hybrids with intervals in the bottom 15 are shown in blue and hybrids with intervals in the top 15 are shown in red.

## 4. Height (130 DAP)

### 4.1 GGE biplot

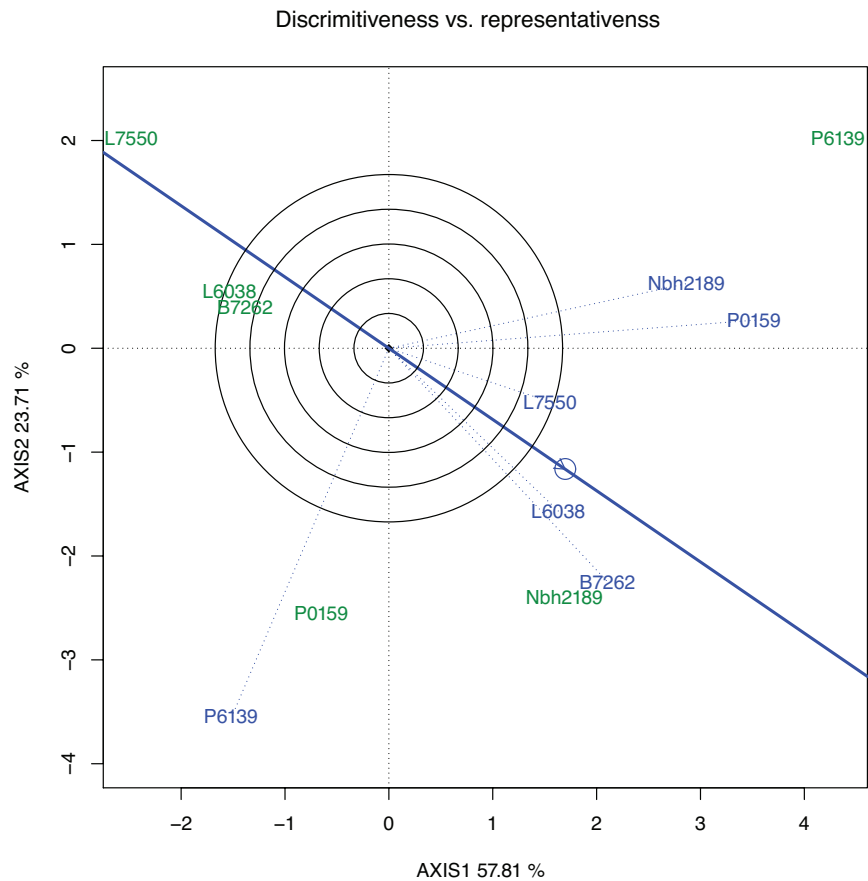

**Figure S13:** Discriminativens vs. representativens view of a biplot for canopy height at 130 days after planting. Parents treated as testers are shown in blue and as entries in green. The blue line indicates the average tester coordinate (ATC) abscissa, with the blue circle indicating the average tester score. The arrow in the circle indicates the direction of increasing GCA for the entries. Parent B7262 was both the most discriminating (had the longest GCA vector) and was representative of other parental lines (vector was close to the ATC abscissa).

## 4.2 Observed and predicted values

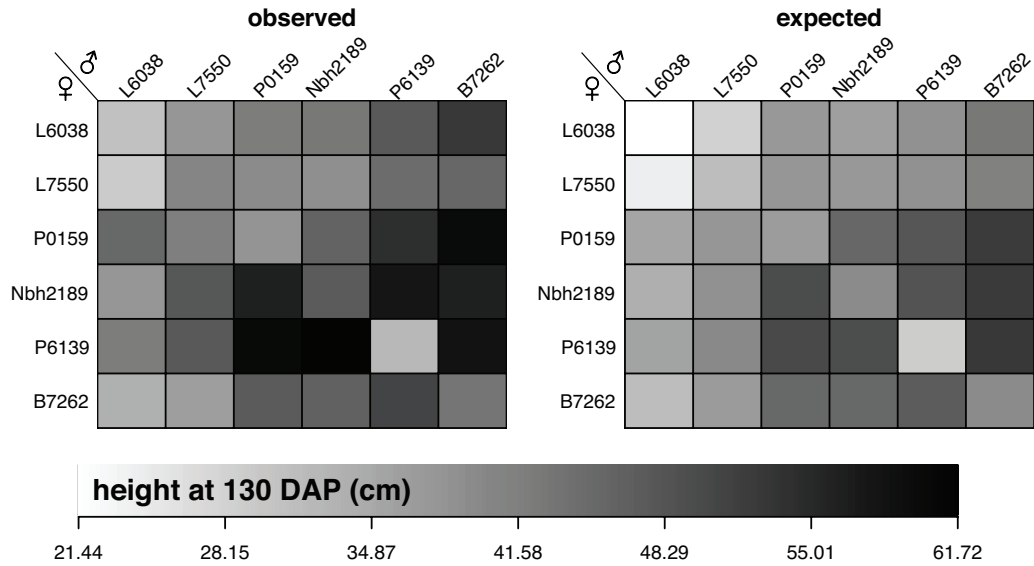

**Figure S14:** Observed (left) and predicted (right) means for height (130 DAP). Posterior predicted means on the right are the result of fitting the model in BayesDiallel to the data on the left.

### 4.3 HPD intervals for inheritance classes

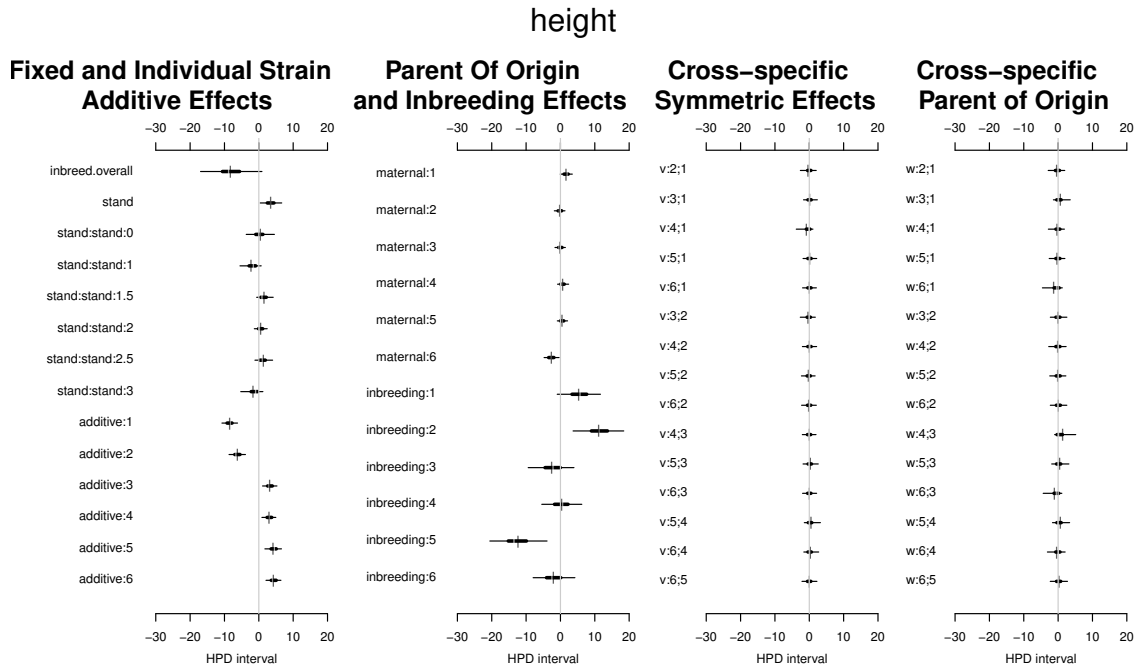

Figure S15: HPD intervals for canopy height (130 DAP; cm).

### 4.4 HPD intervals for fixed and random effects

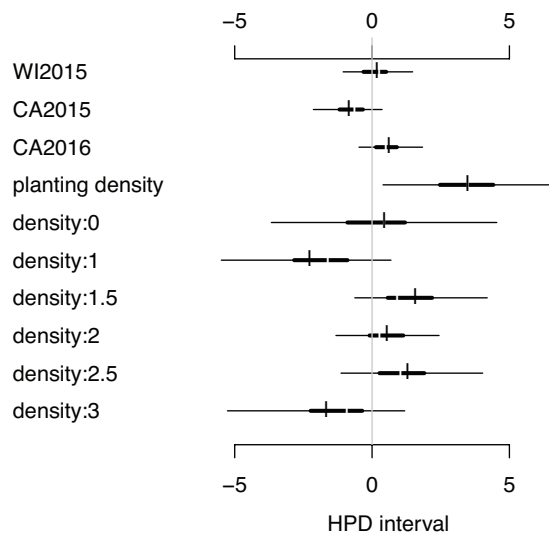

Figure S16: HPD intervals of fixed and random effects for canopy height (130 DAP; cm). Planting density ranged from 0 (low) to 3 (high).



## 4.5 Degree of dominance

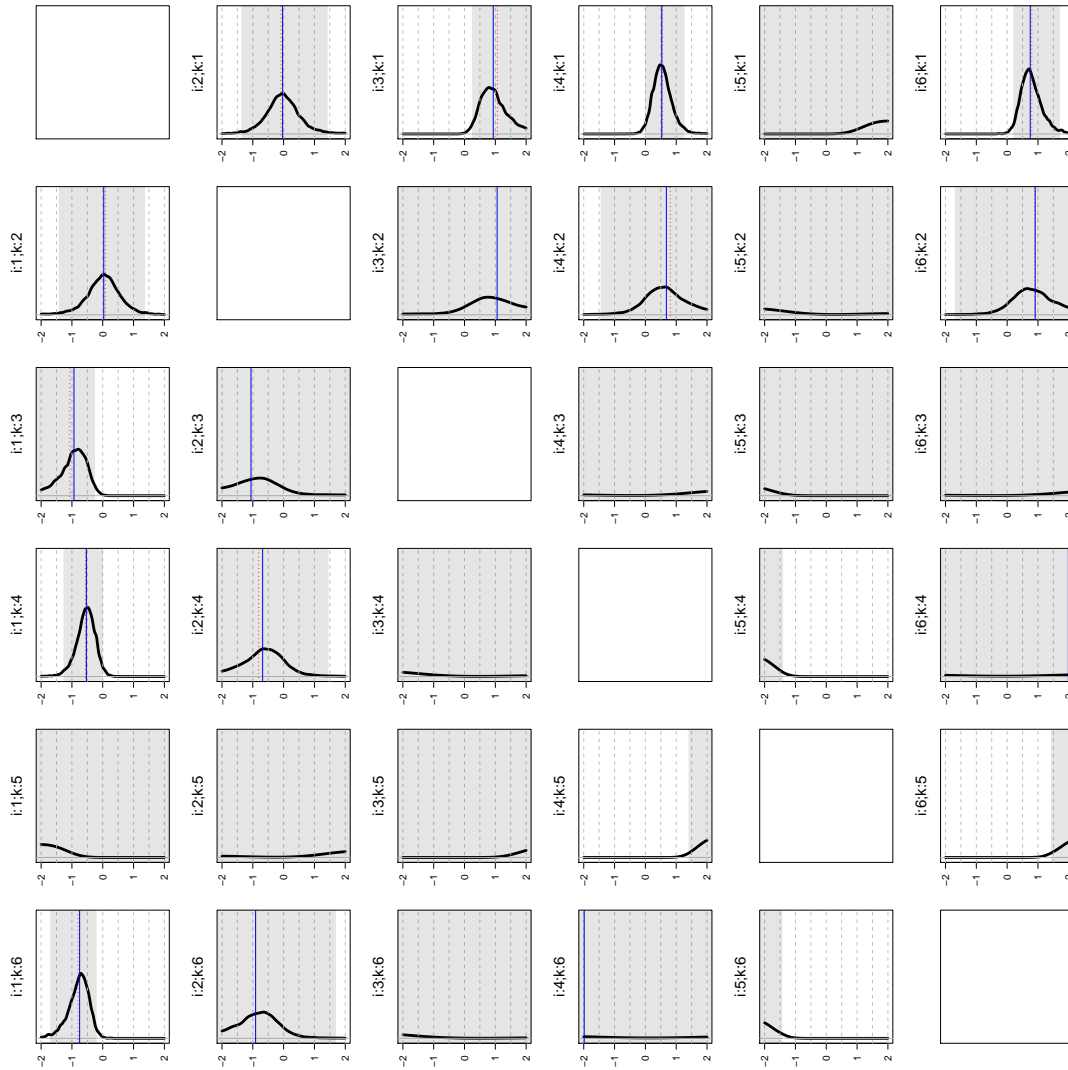

**Figure S17:** Posterior distributions of the degree of dominance for height (130 DAP). Posterior means within the interval are indicated by red dotted lines and medians by blue solid lines, with 95% central quantiles shown in grey. A signal was considered strong if the mean, median, and the majority of the posterior distribution fell within the specified ranges: pseudo-underrecessive  $(-\infty, -1.5)$ , recessive  $(-1.5, -0.5)$ , additive  $(-0.5, 0.5)$ , dominant  $(0.5, 1.5)$ , pseudo-overdominant  $(1.5, \infty)$ . Key for parental lines: 1=L6038, 2=L7550, 3=P0159, 4=Nbh2189, 5=P6139, 6=B7262.

## 4.6 GxE

### 4.6.1 GCA x environment interactions

**Table S6:** GCA for plant height (130 DAP; cm) in each growing environment.

| Parent  | WI2015 | CA2015   | CA2016   |
|---------|--------|----------|----------|
| L6038   | -4.14* | -8.52*** | -6.83*** |
| L7550   | -3.78  | -4.83**  | -6.21**  |
| P0159   | 1.21   | 4.44**   | -1.37    |
| Nbh2189 | 2.31   | 4.35*    | 4.2      |
| P6139   | 4.65*  | 1.51     | 5.44*    |
| B7262   | -0.25  | 3.05     | 4.77*    |

\*\*\*P $\leq$ 0.001, \*\*P $\leq$ 0.01, \*P $\leq$ 0.05

**Table S7:** Nonparametric correlations (Spearman's rho) among environments for GCA of plant height (130 DAP).

| Environment   | Spearman's rho |
|---------------|----------------|
| WI2015-CA2015 | 0.60           |
| WI2015-CA2016 | 0.83*          |
| CA2015-CA2016 | 0.43           |

\*\*\*P $\leq$ 0.001, \*\*P $\leq$ 0.01, \*P $\leq$ 0.05

## 4.6.2 Reciprocal x environment interactions

**Table S8:** Reciprocal effects for plant height (130 DAP; cm) in each location.

| F1 hybrids      | WI2015    | CA2015   | CA2016    |
|-----------------|-----------|----------|-----------|
| L6038 x L7550   | 6.38**    | 2.25     | 4.42*     |
| L6038 x P0159   | -1.93     | 1.75     | -6.46**   |
| L6038 x Nbh2189 | 1.83      | 5.13*    | 0.33      |
| L6038 x P6139   | 4.83*     | 0.92     | 2.54      |
| L6038 x B7262   | 10.71***  | 7.29***  | 11.79***  |
| L7550 x L6038   | -6.38**   | -2.25    | -4.42*    |
| L7550 x P0159   | 1.45      | -4.38*   | -1.92     |
| L7550 x Nbh2189 | -4.75     | -0.08    | -8.06**   |
| L7550 x P6139   | -3.42     | 0.29     | -1.38     |
| L7550 x B7262   | 1.58      | -0.67    | 6.46*     |
| P0159 x L6038   | 1.93      | -1.75    | 6.46**    |
| P0159 x L7550   | -1.45     | 4.38*    | 1.92      |
| P0159 x Nbh2189 | -9.58*    | -1.75    | -8.56***  |
| P0159 x P6139   | -5.25**   | -5.5**   | 1.88      |
| P0159 x B7262   | 3.85      | 0.71     | 15.65***  |
| Nbh2189 x L6038 | -1.83     | -5.13*   | -0.33     |
| Nbh2189 x L7550 | 4.75      | 0.08     | 8.06**    |
| Nbh2189 x P0159 | 9.58*     | 1.75     | 8.56***   |
| Nbh2189 x P6139 | -1.33     | -5.71**  | 1.29      |
| Nbh2189 x B7262 | 7.46      | -0.13    | 14.71***  |
| P6139 x L6038   | -4.83*    | -0.92    | -2.54     |
| P6139 x L7550   | 3.42      | -0.29    | 1.38      |
| P6139 x P0159   | 5.25**    | 5.5**    | -1.88     |
| P6139 x Nbh2189 | 1.33      | 5.71**   | -1.29     |
| P6139 x B7262   | 2.65      | 0.54     | 4.54*     |
| B7262 x L6038   | -10.71*** | -7.29*** | -11.79*** |
| B7262 x L7550   | -1.58     | 0.67     | -6.46*    |
| B7262 x P0159   | -3.85     | -0.71    | -15.65*** |
| B7262 x Nbh2189 | -7.46     | 0.13     | -14.71*** |
| B7262 x P6139   | -2.65     | -0.54    | -4.54*    |

\*\*\*P $\leq$ 0.001, \*\*P $\leq$ 0.01, \*P $\leq$ 0.05

**Table S9:** Nonparametric correlations (Spearman's rho) among environments for reciprocal effects of plant height (130 DAP).

| Environment   | Spearman's rho |
|---------------|----------------|
| WI2015-CA2015 | 0.53***        |
| WI2015-CA2016 | 0.79***        |
| CA2015-CA2016 | 0.28           |

\*\*\*P $\leq$ 0.001, \*\*P $\leq$ 0.01, \*P $\leq$ 0.05

### 4.6.3 Rankings by environment

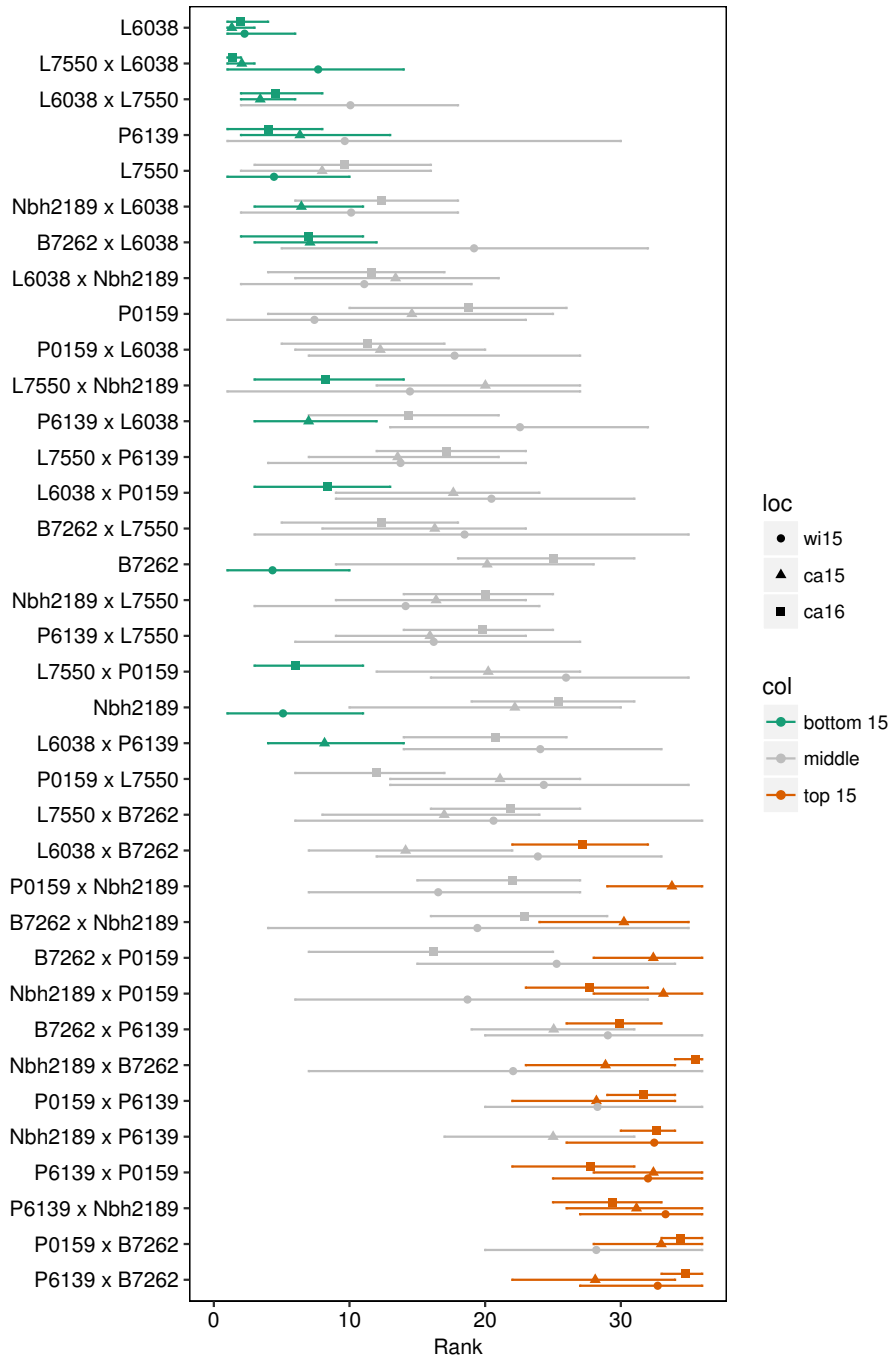

**Figure S18:** Mean values and 95% highest posterior density (HPD) intervals of hybrid rankings for canopy height (cm; 130 DAP). Hybrids with intervals in the bottom 15 are shown in blue and hybrids with intervals in the top 15 are shown in red.

# 5. Midseason width (80 DAP)

## 5.1 GGE biplot

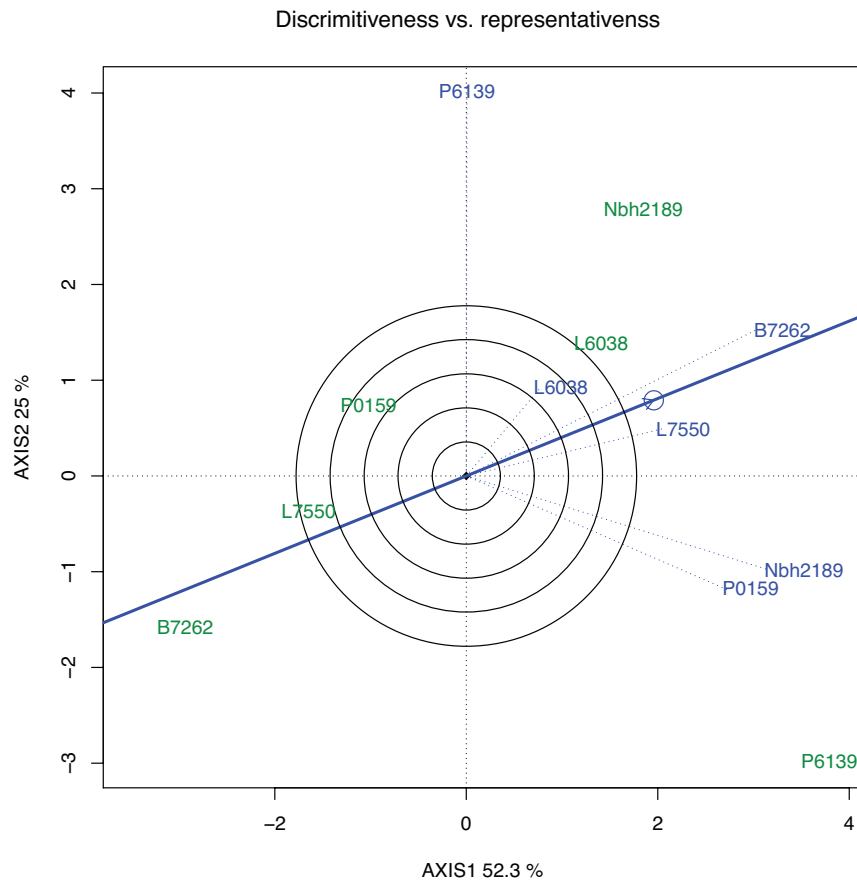

**Figure S19:** Discriminativenss vs. representativenss view of a biplot for canopy width at 80 days after planting. Parents treated as testers are shown in blue and as entries in green. The blue line indicates the average tester coordinate (ATC) abscissa, with the blue circle indicating the average tester score. The arrow in the circle indicates the direction of increasing GCA for the entries. Parent B7262 was both the most discriminating (had the longest vector) and was representative of other parental lines (vector was close to the ATC abscissa).

## 5.2 Observed and predicted values

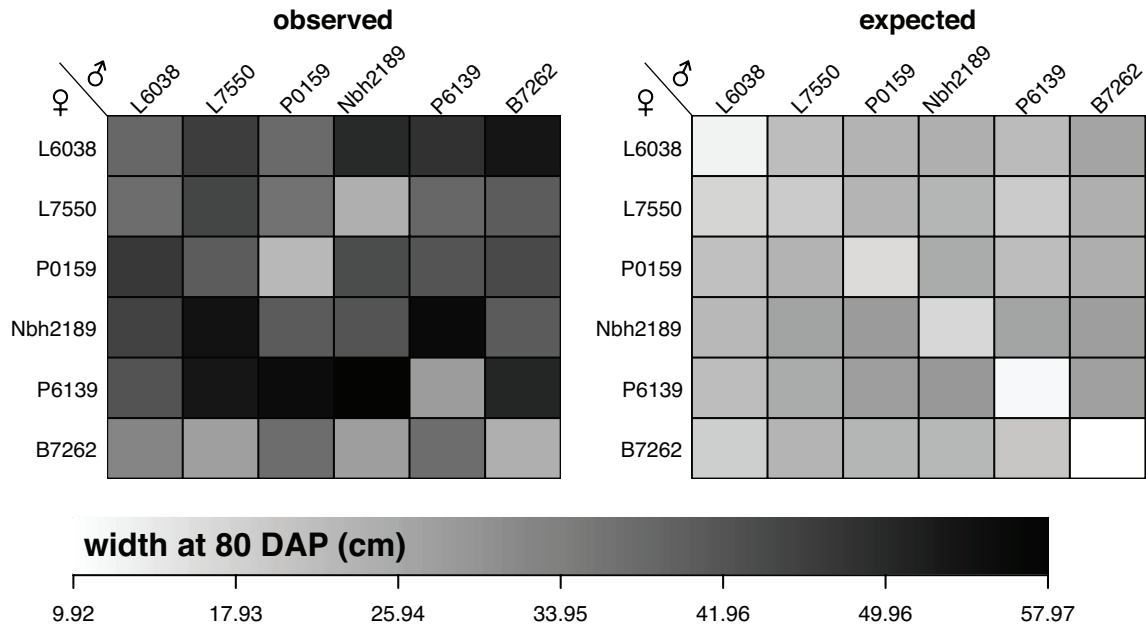

**Figure S20:** Observed (left) and predicted (right) means for width (80 DAP). Posterior predicted means on the right are the result of fitting the model in BayesDiallel to the data on the left.



### 5.3 HPD intervals for inheritance classes

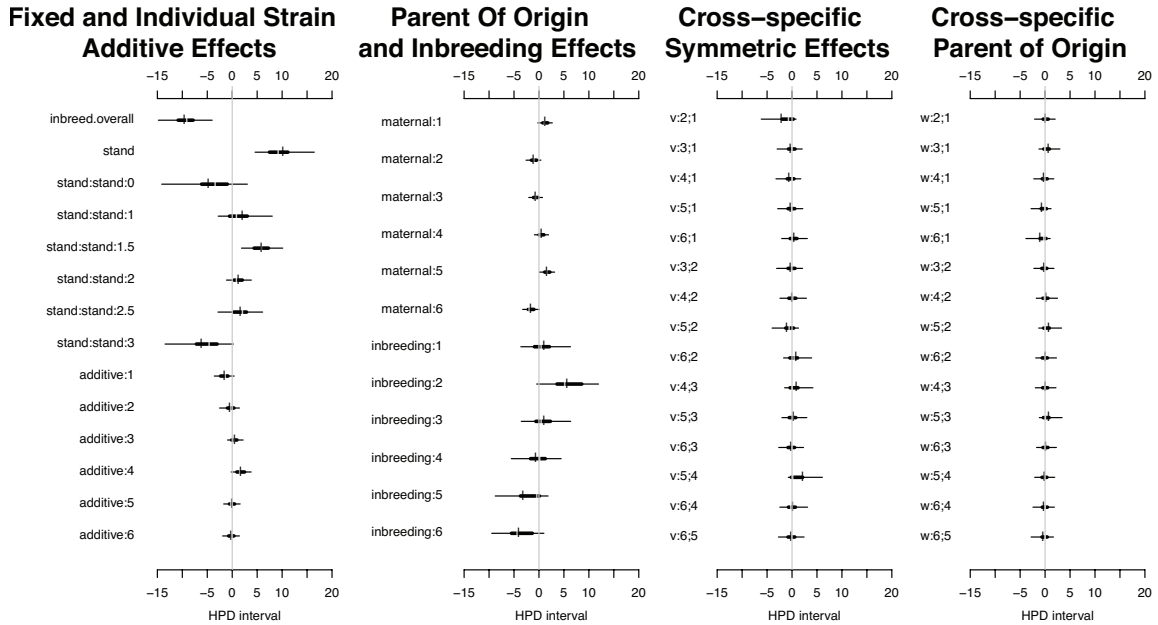

Figure S21: HPD intervals for canopy width (80 DAP; cm).

### 5.4 HPD intervals for fixed and random effects

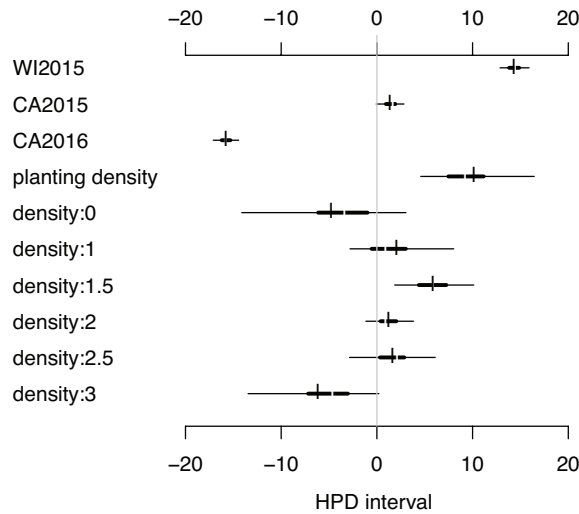

Figure S22: HPD intervals of fixed and random effects for canopy width (80 DAP; cm). Planting density ranged from 0 (low) to 3 (high).

## 5.5 Degree of dominance

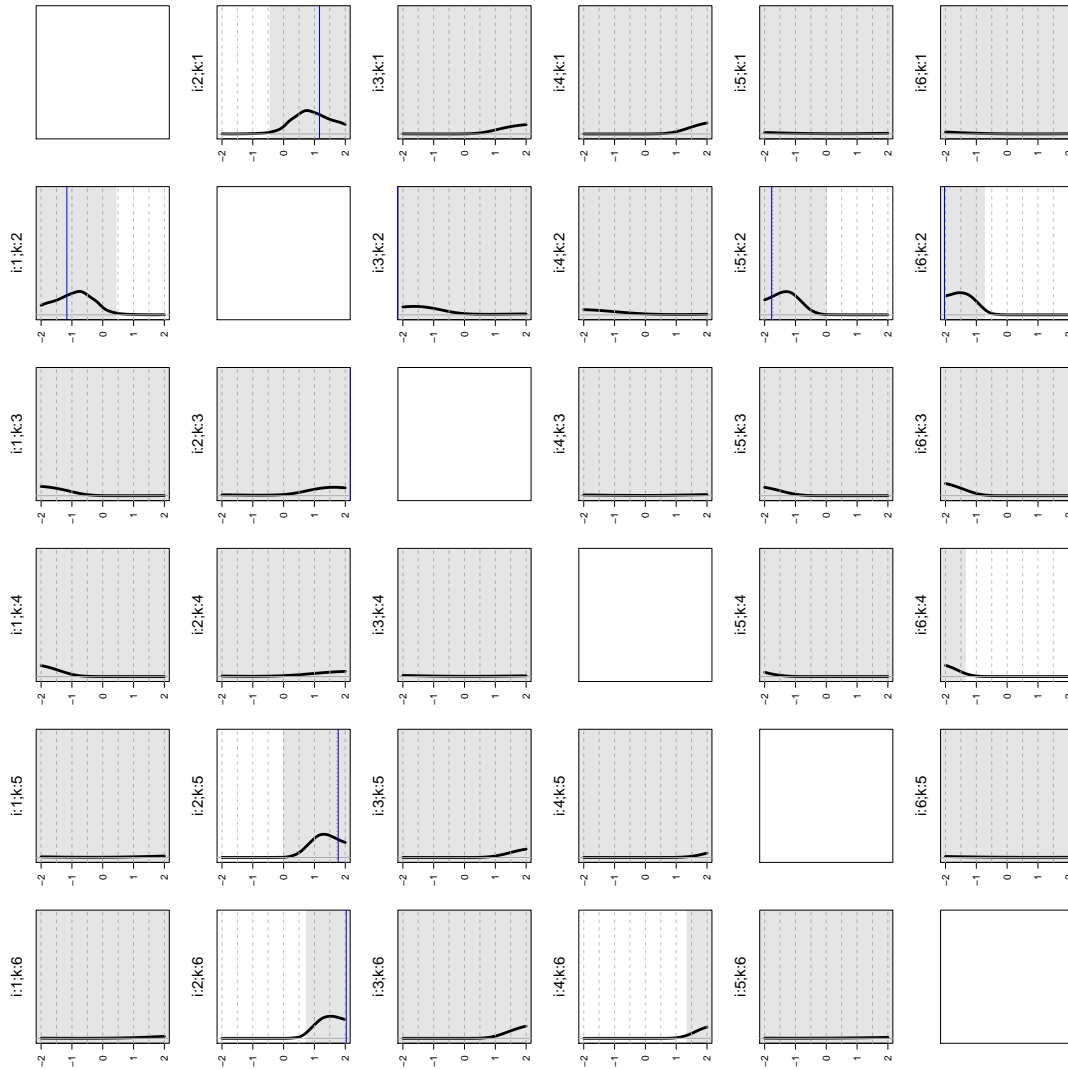

**Figure S23:** Posterior distributions of the degree of dominance for midseason width (80 DAP). Posterior means within the interval are indicated by red dotted lines and medians by blue solid lines, with 95% central quantiles shown in grey. A signal was considered strong if the mean, median, and the majority of the posterior distribution fell within the specified ranges: pseudo-underrecessive  $(-\infty, -1.5)$ , recessive  $(-1.5, -0.5)$ , additive  $(-0.5, 0.5)$ , dominant  $(0.5, 1.5)$ , pseudo-overdominant  $(1.5, \infty)$ . Key for parental lines: 1=L6038, 2=L7550, 3=P0159, 4=Nbh2189, 5=P6139, 6=B7262.

## 5.6 GxE

### 5.6.1 Rankings by environment

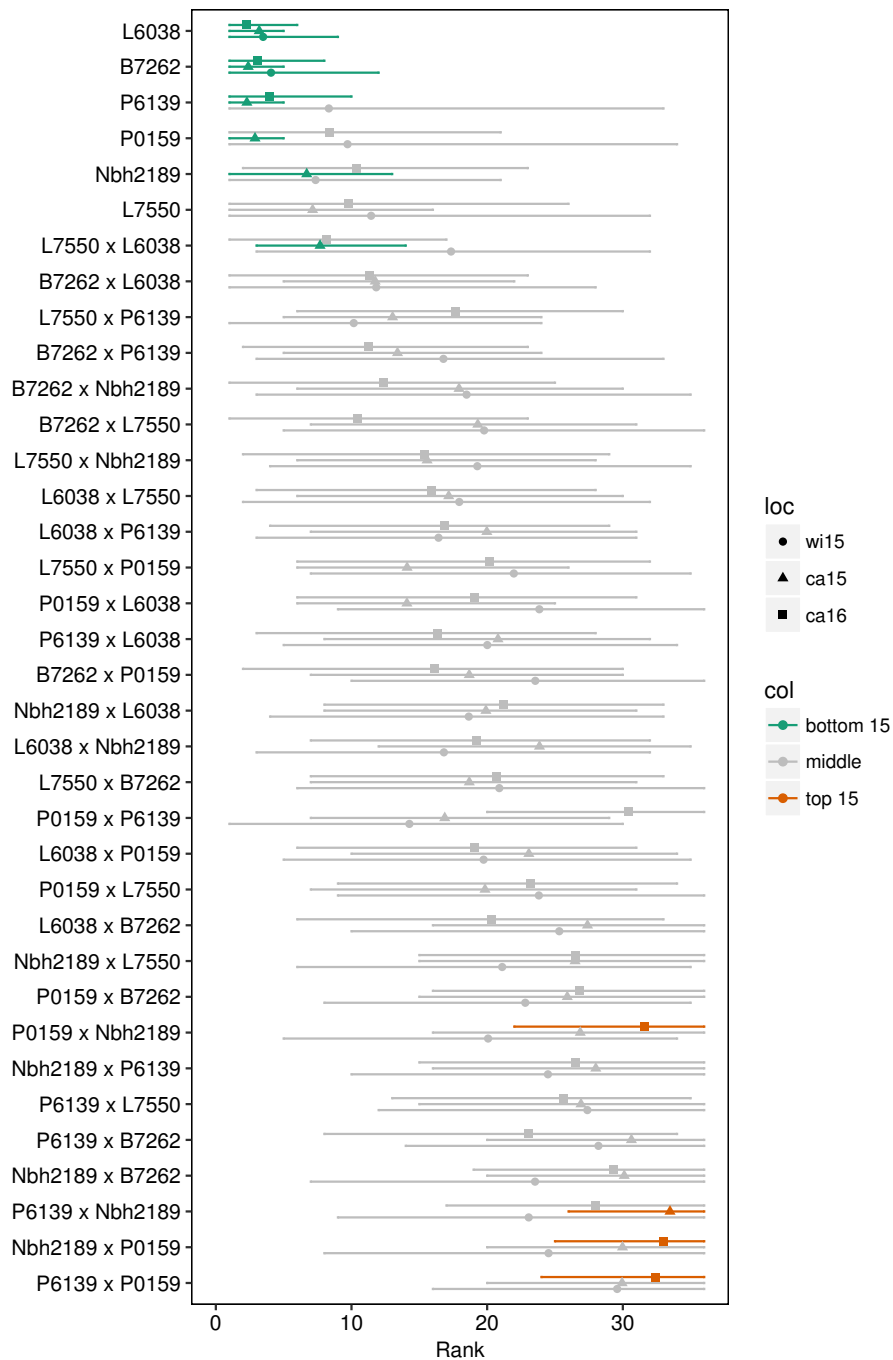

**Figure S24:** Mean values and 95% highest posterior density (HPD) intervals of hybrid rankings for canopy width (cm; 80 DAP). Hybrids with intervals in the bottom 15 are shown in blue and hybrids with intervals in the top 15 are shown in red.

# 6. Width (130 DAP)

## 6.1 GGE biplot

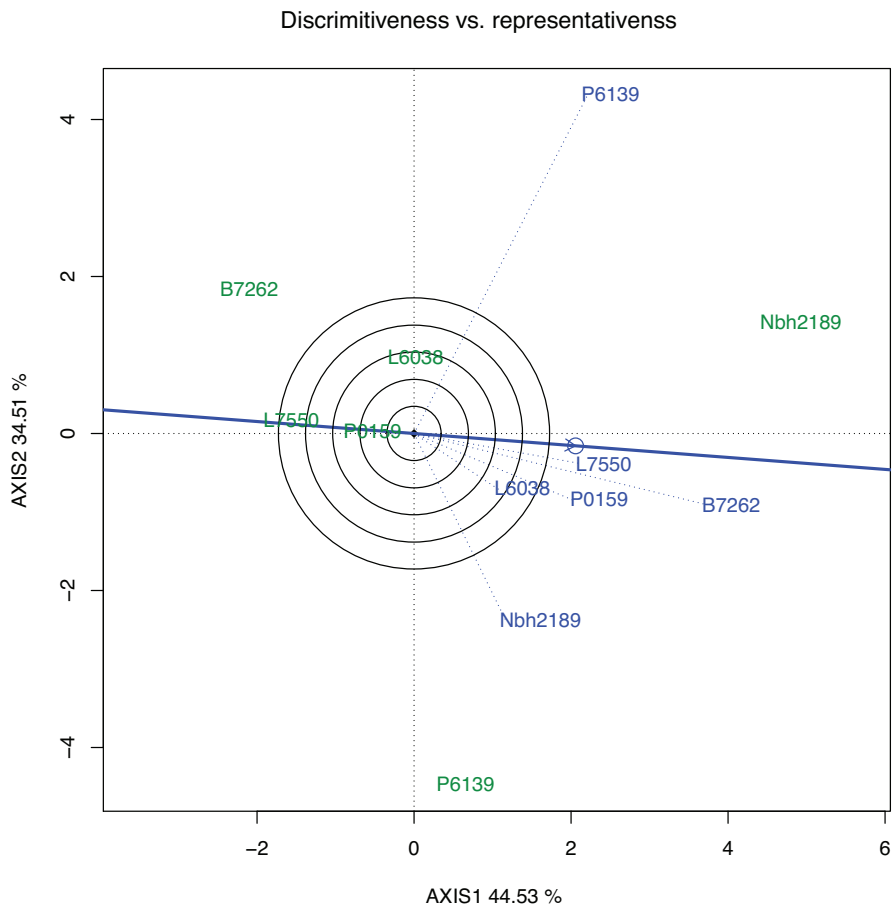

**Figure S25:** Discriminativens vs. representativens view of a biplot for canopy width at 130 days after planting. Parents treated as testers are shown in blue and as entries in green. The blue line indicates the average tester coordinate (ATC) abscissa, with the blue circle indicating the average tester score. The arrow in the circle indicates the direction of increasing GCA for the entries. Parent B7262 was both the most discriminating (had the longest vector) and was representative of other parental lines (vector was close to the ATC abscissa).

## 6.2 Observed and predicted values

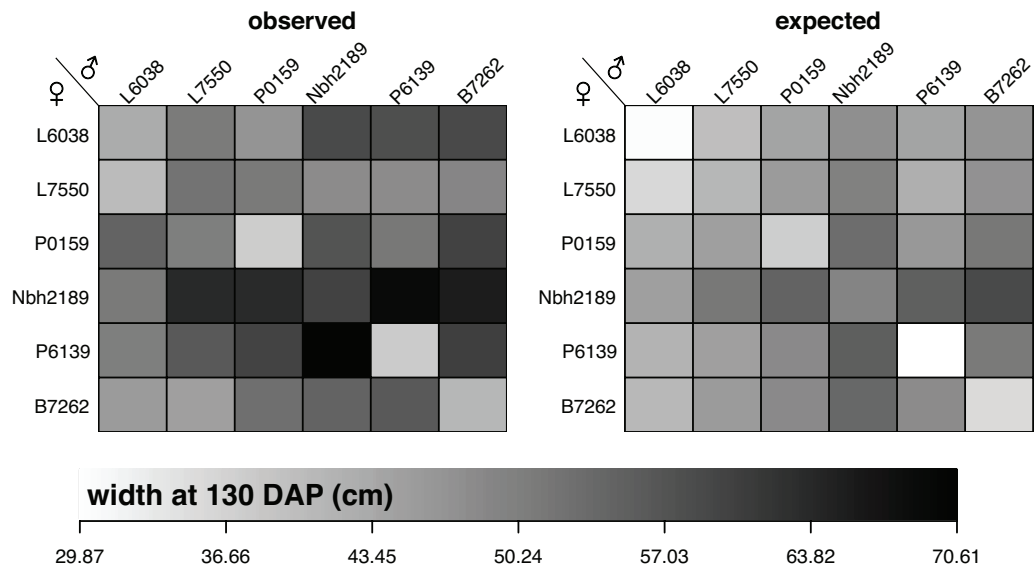

**Figure S26:** Observed (left) and predicted (right) means for width (130 DAP). Posterior predicted means on the right are the result of fitting the model in BayesDiallel to the data on the left.

### 6.3 HPD intervals for inheritance classes

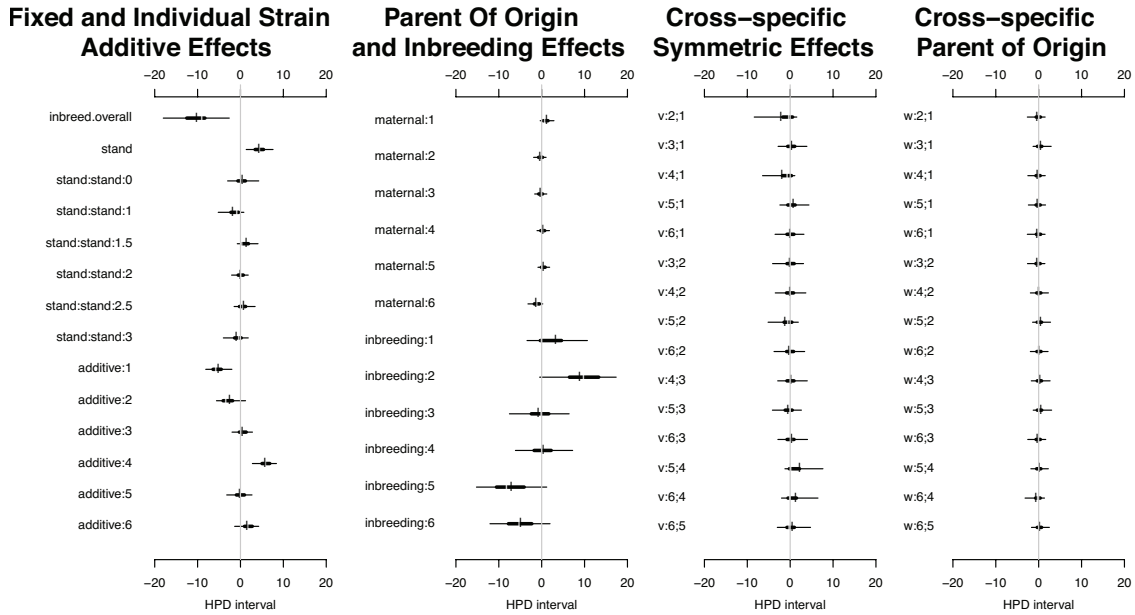

Figure S27: HPD intervals for canopy width (130 DAP; cm).

### 6.4 HPD intervals for fixed and random effects

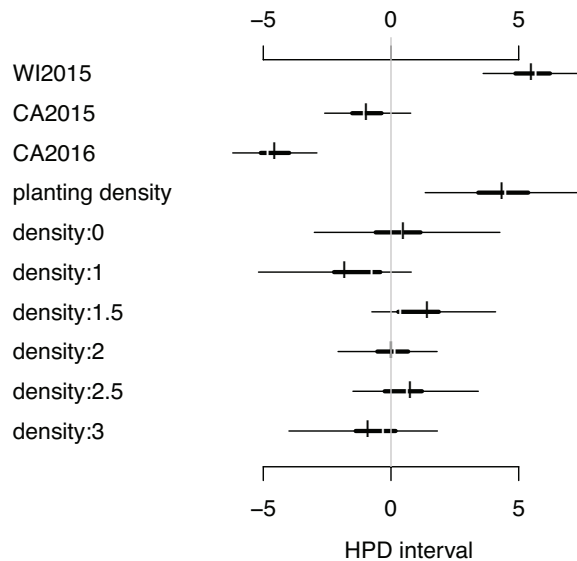

Figure S28: HPD intervals of fixed and random effects for canopy width (130 DAP; cm). Planting density ranged from 0 (low) to 3 (high).

## 6.5 Degree of dominance

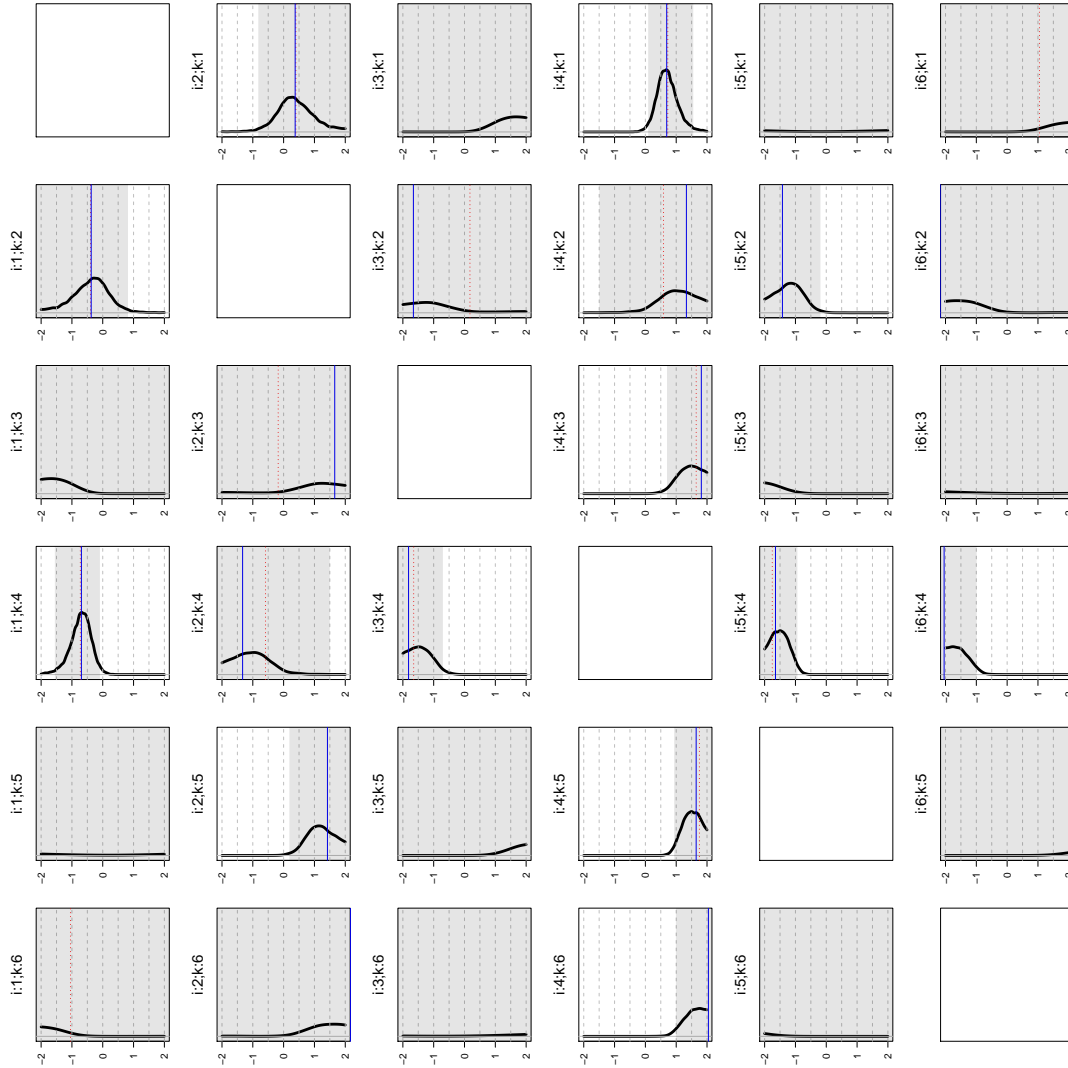

**Figure S29:** Posterior distributions of the degree of dominance for canopy width (130 DAP). Posterior means within the interval are indicated by red dotted lines and medians by blue solid lines, with 95% central quantiles shown in grey. A signal was considered strong if the mean, median, and the majority of the posterior distribution fell within the specified ranges: pseudo-underrecessive  $(-\infty, -1.5)$ , recessive  $(-1.5, -0.5)$ , additive  $(-0.5, 0.5)$ , dominant  $(0.5, 1.5)$ , pseudo-overdominant  $(1.5, \infty)$ . Key for parental lines: 1=L6038, 2=L7550, 3=P0159, 4=Nbh2189, 5=P6139, 6=B7262.

## 6.6 GxE

### 6.6.1 Rankings by environment

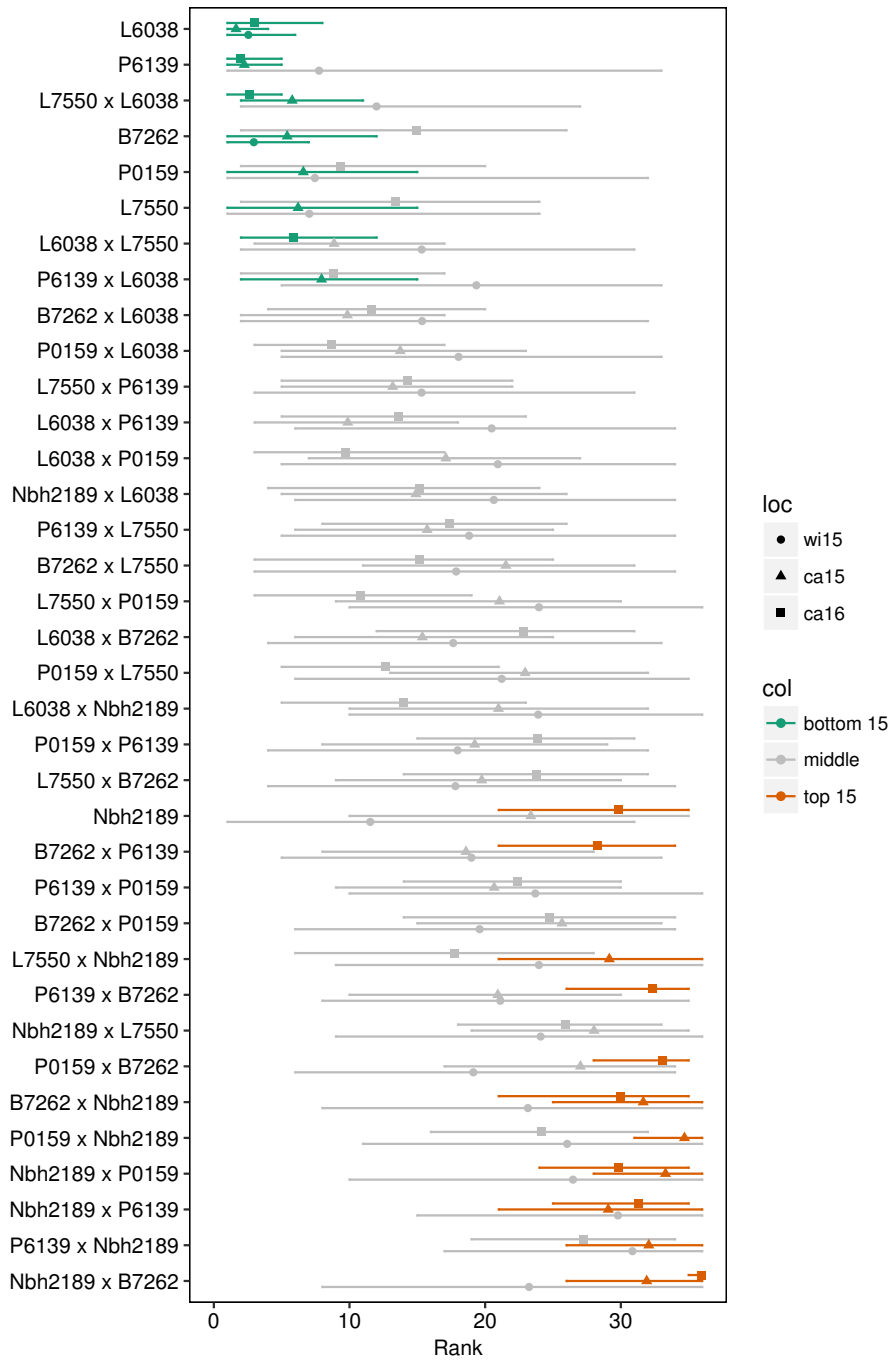

**Figure S30:** Mean values and 95% highest posterior density (HPD) intervals of hybrid rankings for canopy width (cm; 130 DAP). Hybrids with intervals in the bottom 15 are shown in blue and hybrids with intervals in the top 15 are shown in red.



# 7. Shoot biomass (fresh)

## 7.1 GGE biplot

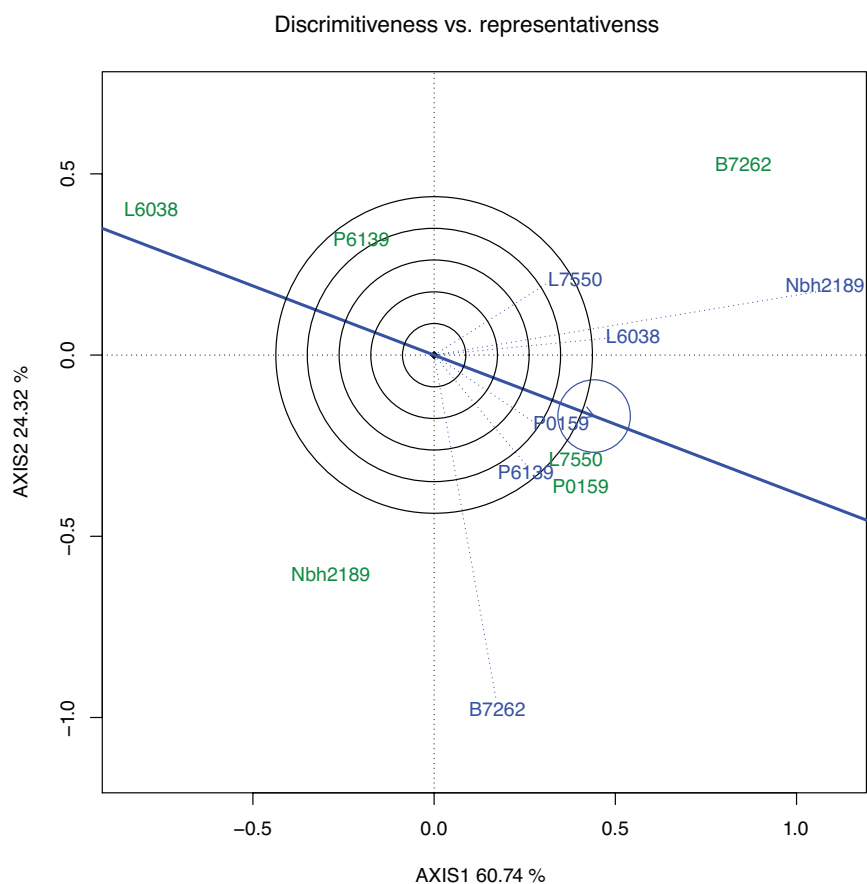

**Figure S31:** Discriminativens vs. representativens view of a biplot for fresh shoot biomass (measured 130 days after planting). Parents treated as testers are shown in blue and as entries in green. The blue line indicates the average tester coordinate (ATC) abscissa, with the blue circle indicating the average tester score. The arrow in the circle indicates the direction of increasing GCA for the entries. Parent P0159 was both the most discriminating (had the longest vector) and was representative of other parental lines (vector was close to the ATC abscissa).

## 7.2 Observed and predicted values

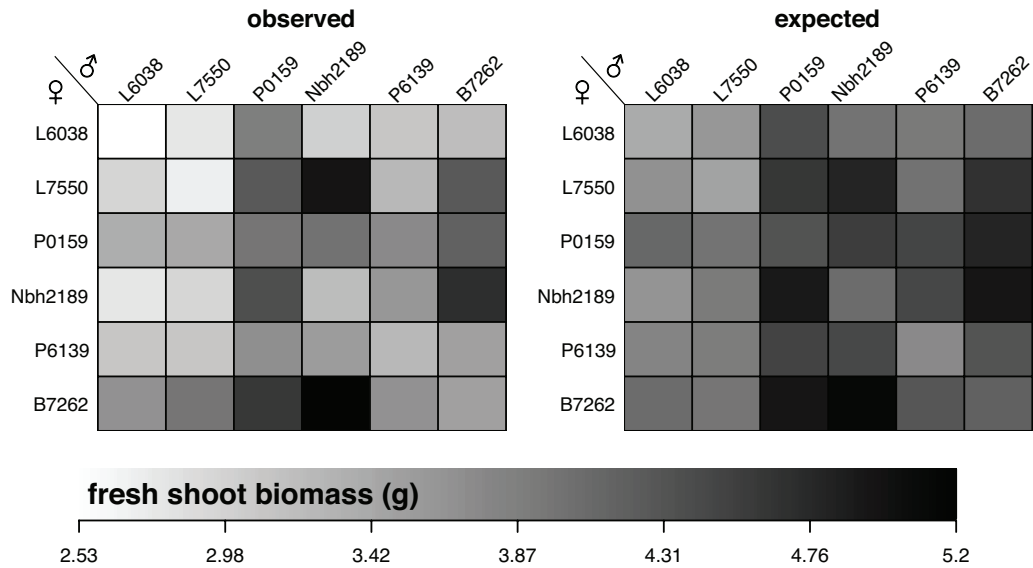

**Figure S32:** Observed (left) and predicted (right) means for fresh shoot biomass (g). Posterior predicted means on the right are the result of fitting the model in BayesDiallel to the data on the left.

### 7.3 HPD intervals for inheritance classes

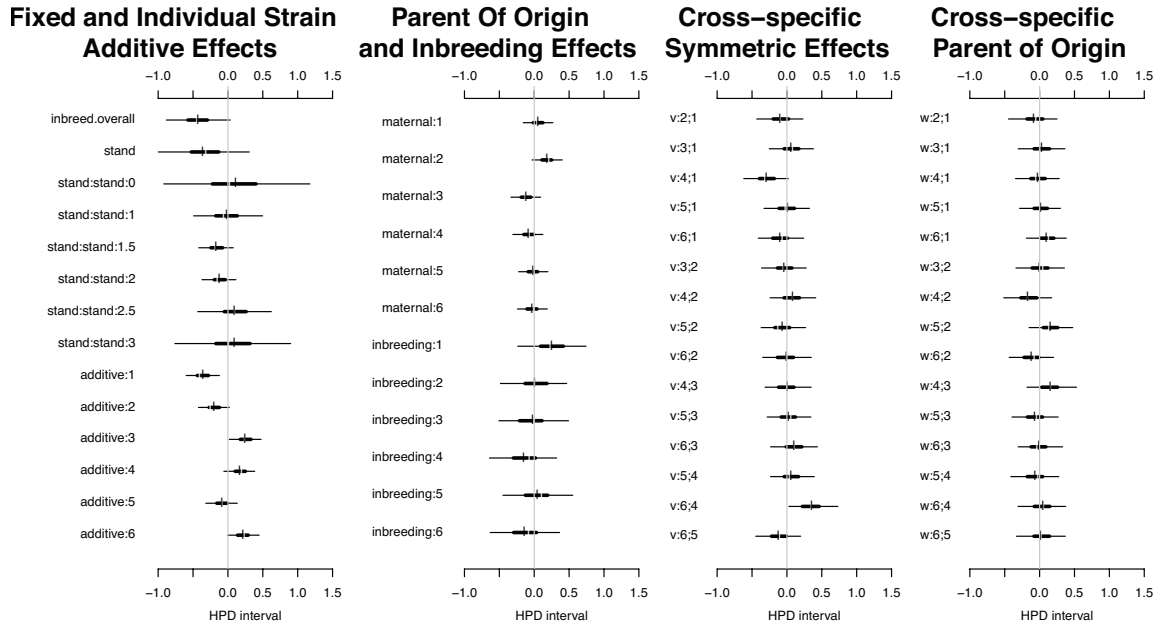

Figure S33: HPD intervals for fresh shoot biomass (g).

### 7.4 HPD intervals for fixed and random effects

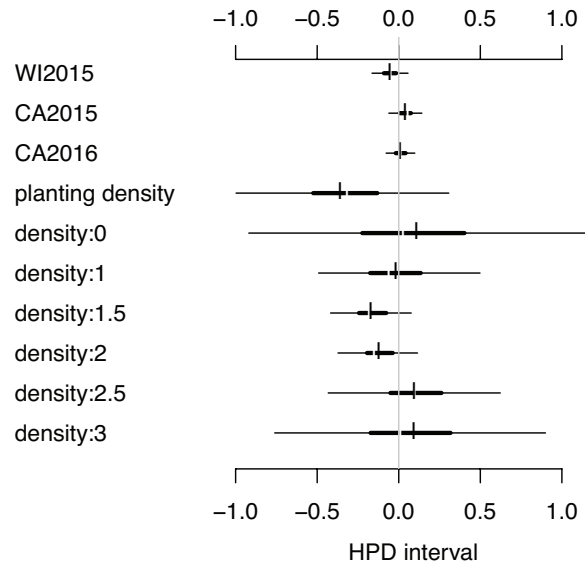

Figure S34: HPD intervals of fixed and random effects for fresh shoot biomass (g). Planting density ranged from 0 (low) to 3 (high).

## 7.5 Degree of dominance

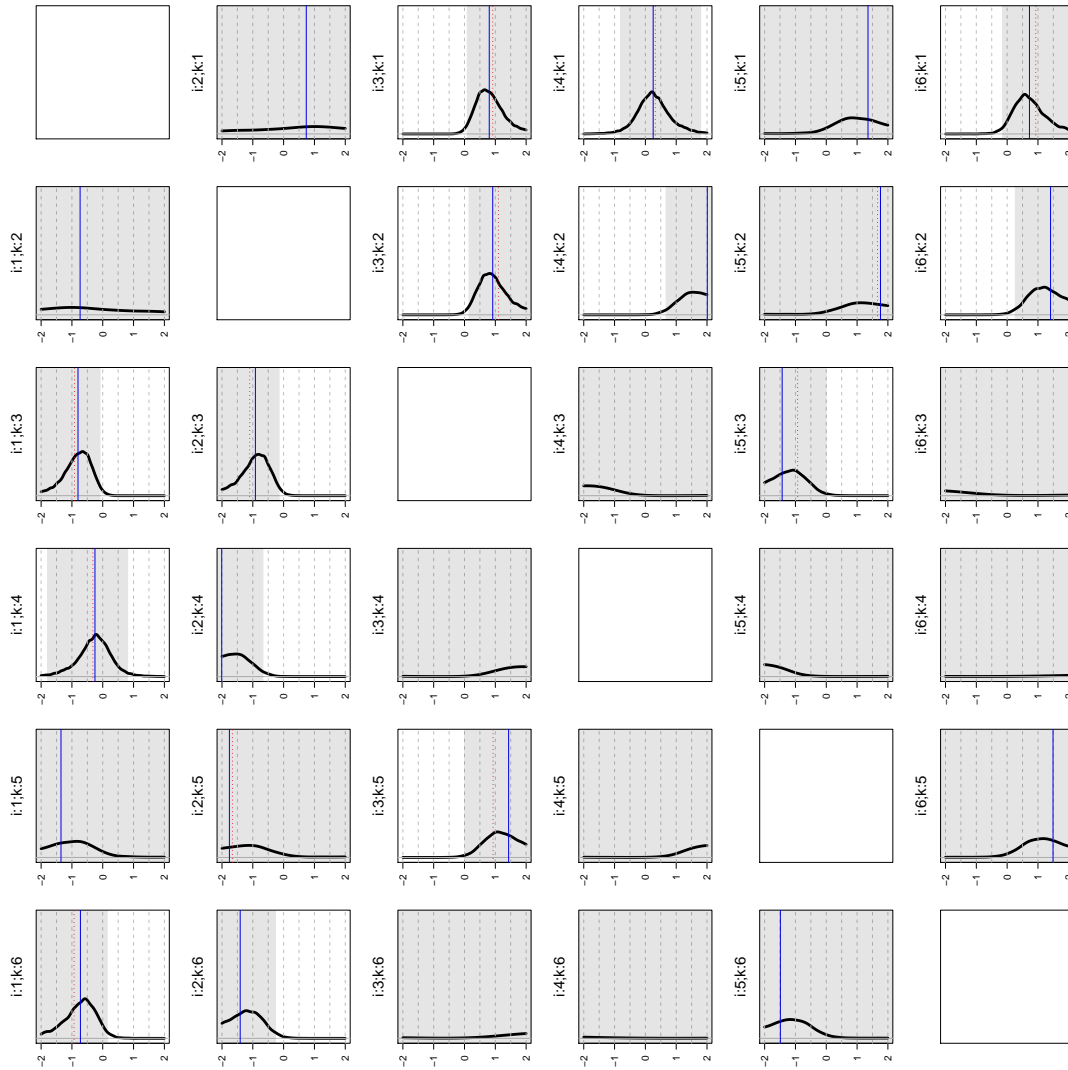

**Figure S35:** Posterior distributions of the degree of dominance for fresh shoot biomass. Posterior means within the interval are indicated by red dotted lines and medians by blue solid lines, with 95% central quantiles shown in grey. A signal was considered strong if the mean, median, and the majority of the posterior distribution fell within the specified ranges: pseudo-underrecessive  $(-\infty, -1.5)$ , recessive  $(-1.5, -0.5)$ , additive  $(-0.5, 0.5)$ , dominant  $(0.5, 1.5)$ , pseudo-overdominant  $(1.5, \infty)$ . Key for parental lines: 1=L6038, 2=L7550, 3=P0159, 4=Nbh2189, 5=P6139, 6=B7262.

## 7.6 GxE

### 7.6.1 GCA x environment interactions

**Table S10:** GCA for fresh shoot biomass (g) in each growing environment.

| Parent  | WI2015 | CA2015   | CA2016   |
|---------|--------|----------|----------|
| L6038   | -0.32* | -0.67*** | -0.42*** |
| L7550   | -0.15  | -0.09    | -0.28**  |
| P0159   | 0.36** | 0.38*    | 0.38***  |
| Nbh2189 | 0.03   | 0.28     | 0.12     |
| P6139   | -0.11  | -0.29*   | -0.02    |
| B7262   | 0.19   | 0.4**    | 0.22*    |

\*\*\*P $\leq$ 0.001, \*\*P $\leq$ 0.01, \*P $\leq$ 0.05

**Table S11:** Nonparametric correlations (Spearman's rho) among environments for GCA of fresh shoot biomass (g).

| Environment   | Spearman's rho |
|---------------|----------------|
| WI2015-CA2015 | 0.89*          |
| WI2015-CA2016 | 1***           |
| CA2015-CA2016 | 0.89*          |

\*\*\*P $\leq$ 0.001, \*\*P $\leq$ 0.01, \*P $\leq$ 0.05

## 7.6.2 SCA x environment interactions

**Table S12:** SCA for fresh shoot biomass (g) in each growing environment.

| F1 hybrids      | WI2015 | CA2015  | CA2016 |
|-----------------|--------|---------|--------|
| L6038 x L7550   | 0.3    | -0.15   | 0      |
| L6038 x P0159   | -0.05  | 0.19    | 0.17   |
| L6038 x Nbh2189 | 0.36   | -0.53*  | -0.5*  |
| L6038 x P6139   | 0.13   | 0.21    | 0.16   |
| L6038 x B7262   | -0.23  | -0.03   | 0.02   |
| L7550 x P0159   | 0.17   | -0.13   | 0.16   |
| L7550 x Nbh2189 | 0.4    | 0.29    | 0.1    |
| L7550 x P6139   | -0.3   | 0.18    | 0.1    |
| L7550 x B7262   | 0.14   | 0.4     | 0.13   |
| P0159 x Nbh2189 | 0      | 0.1     | 0.07   |
| P0159 x P6139   | -0.29  | 0.13    | -0.12  |
| P0159 x B7262   | -0.17  | 0       | -0.08  |
| Nbh2189 x P6139 | 0.37   | -0.18   | 0.17   |
| Nbh2189 x B7262 | 0.4    | 1.01*** | 0.29   |
| P6139 x B7262   | -0.19  | -0.37   | -0.03  |
| Parental selfs  |        |         |        |
| L6038           | -0.54  | 0.31    | 0.08   |
| L7550           | -0.22  | -0.61   | -0.24  |
| P0159           | -0.38  | -0.29   | -0.22  |
| Nbh2189         | -0.53  | -0.68*  | -0.06  |
| P6139           | -0.1   | 0.02    | -0.35  |
| B7262           | -0.73  | -1.01** | -0.41  |

\*\*\*P $\leq$ 0.001, \*\*P $\leq$ 0.01, \*P $\leq$ 0.05

**Table S13:** Nonparametric correlations (Spearman's rho) among environments for SCA of fresh shoot biomass (g).

| Environment   | Spearman's rho |
|---------------|----------------|
| WI2015-CA2015 | 0.32           |
| WI2015-CA2016 | 0.46*          |
| CA2015-CA2016 | 0.66**         |

\*\*\*P $\leq$ 0.001, \*\*P $\leq$ 0.01, \*P $\leq$ 0.05

### 7.6.3 Reciprocal x environment interactions

**Table S14:** Reciprocal effects for fresh shoot biomass (g) in each location.

| F1 hybrids      | WI2015   | CA2015   | CA2016  |
|-----------------|----------|----------|---------|
| L6038 x L7550   | -0.17    | -0.05    | -0.04   |
| L6038 x P0159   | 0        | 0.23     | 0.31*   |
| L6038 x Nbh2189 | 0.25*    | 0.24*    | -0.12   |
| L6038 x P6139   | 0.26*    | -0.1     | -0.16   |
| L6038 x B7262   | -0.02    | -0.08    | -0.17   |
| L7550 x L6038   | 0.17     | 0.05     | 0.04    |
| L7550 x P0159   | 0.83***  | 0.5***   | 0.2     |
| L7550 x Nbh2189 | 0.54**   | 1.09***  | 0.53**  |
| L7550 x P6139   | -0.13    | 0.19     | 0.19    |
| L7550 x B7262   | 0.23     | 0.79***  | -0.12   |
| P0159 x L6038   | 0        | -0.23    | -0.31*  |
| P0159 x L7550   | -0.83*** | -0.5***  | -0.2    |
| P0159 x Nbh2189 | 0.06     | -0.2     | -0.01   |
| P0159 x P6139   | -0.09    | 0.01     | 0.15    |
| P0159 x B7262   | -0.1     | -0.03    | 0.05    |
| Nbh2189 x L6038 | -0.25*   | -0.24*   | 0.12    |
| Nbh2189 x L7550 | -0.54**  | -1.09*** | -0.53** |
| Nbh2189 x P0159 | -0.06    | 0.2      | 0.01    |
| Nbh2189 x P6139 | 0.19     | -0.08    | -0.02   |
| Nbh2189 x B7262 | -0.29    | -0.27*   | -0.24*  |
| P6139 x L6038   | -0.26*   | 0.1      | 0.16    |
| P6139 x L7550   | 0.13     | -0.19    | -0.19   |
| P6139 x P0159   | 0.09     | -0.01    | -0.15   |
| P6139 x Nbh2189 | -0.19    | 0.08     | 0.02    |
| P6139 x B7262   | 0.16     | -0.1     | -0.16   |
| B7262 x L6038   | 0.02     | 0.08     | 0.17    |
| B7262 x L7550   | -0.23    | -0.79*** | 0.12    |
| B7262 x P0159   | 0.1      | 0.03     | -0.05   |
| B7262 x Nbh2189 | 0.29     | 0.27*    | 0.24*   |
| B7262 x P6139   | -0.16    | 0.1      | 0.16    |

\*\*\*P≤0.001, \*\*P≤0.01, \*P≤0.05

**Table S15:** Nonparametric correlations (Spearman's rho) among environments for reciprocal effects of fresh shoot biomass (g).

| Environment   | Spearman's rho |
|---------------|----------------|
| WI2015-CA2015 | 0.45**         |
| WI2015-CA2016 | 0.09           |
| CA2015-CA2016 | 0.65***        |

\*\*\*P≤0.001, \*\*P≤0.01, \*P≤0.05

### 7.6.4 Rankings by environment

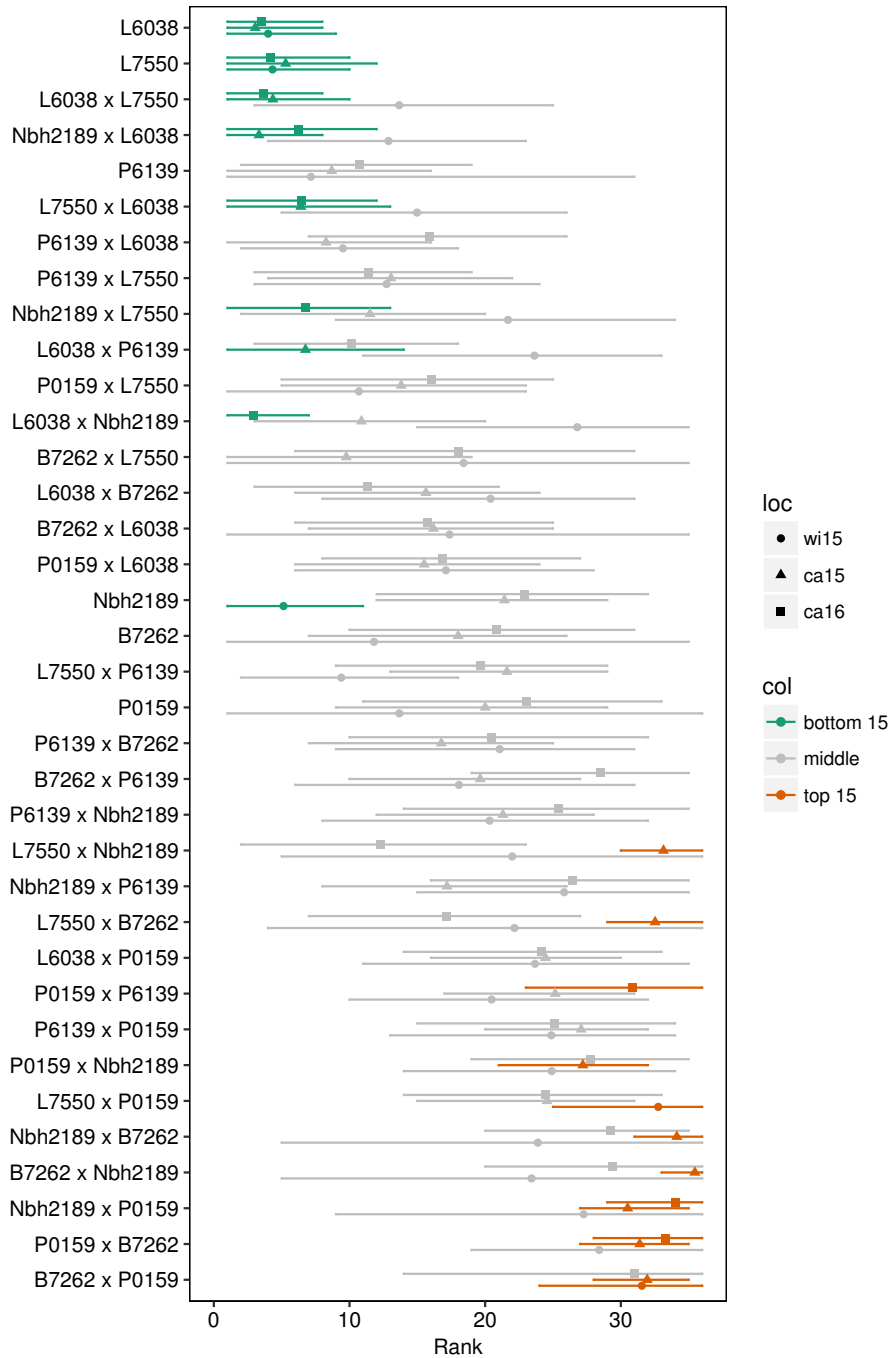

**Figure S36:** Mean values and 95% highest posterior density (HPD) intervals of hybrid rankings for fresh shoot biomass (g; 130 DAP). Hybrids with intervals in the bottom 15 are shown in blue and hybrids with intervals in the top 15 are shown in red.



# 8. Shoot biomass (dry)

## 8.1 GGE biplot

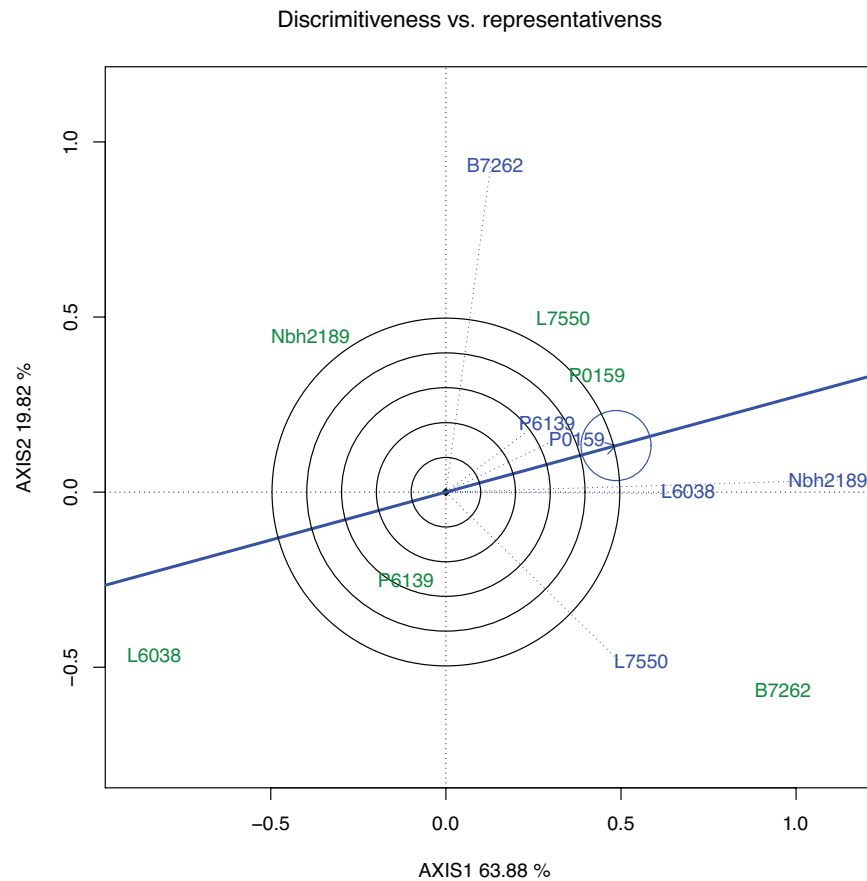

**Figure S37:** Discriminativens vs. representativens view of a biplot for dry shoot biomass (measured 130 days after planting). Parents treated as testers are shown in blue and as entries in green. The blue line indicates the average tester coordinate (ATC) abscissa, with the blue circle indicating the average tester score. The arrow in the circle indicates the direction of increasing GCA for the entries. Parent Nbh2189 was the most discriminating (had the longest vector) and parent P0159 was the most representative of other parental lines (vector was close to the ATC abscissa).

## 8.2 Observed and predicted values

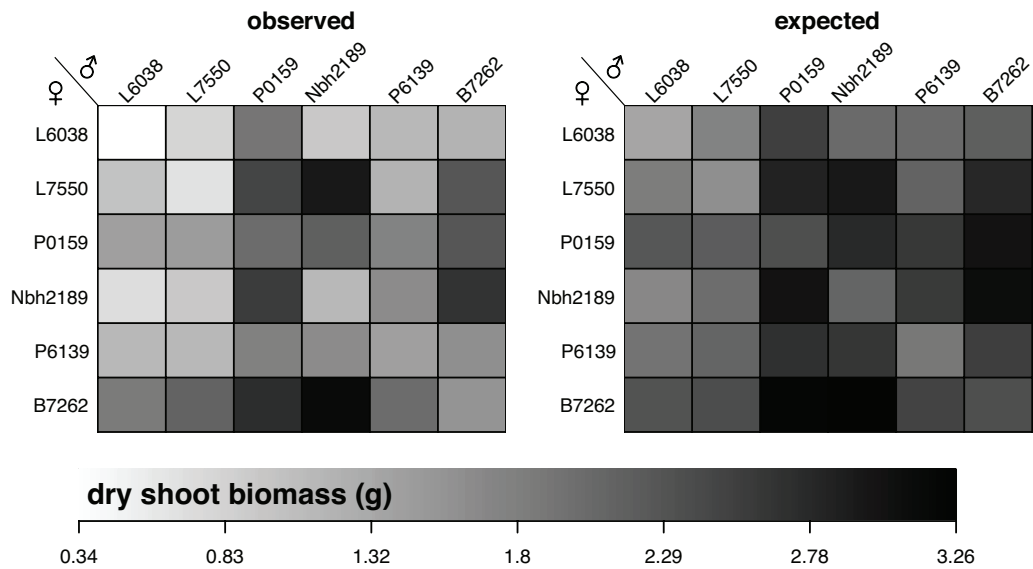

**Figure S38:** Observed (left) and predicted (right) means for dry shoot biomass (g). Posterior predicted means on the right are the result of fitting the model in BayesDiallel to the data on the left.

### 8.3 HPD intervals for inheritance classes

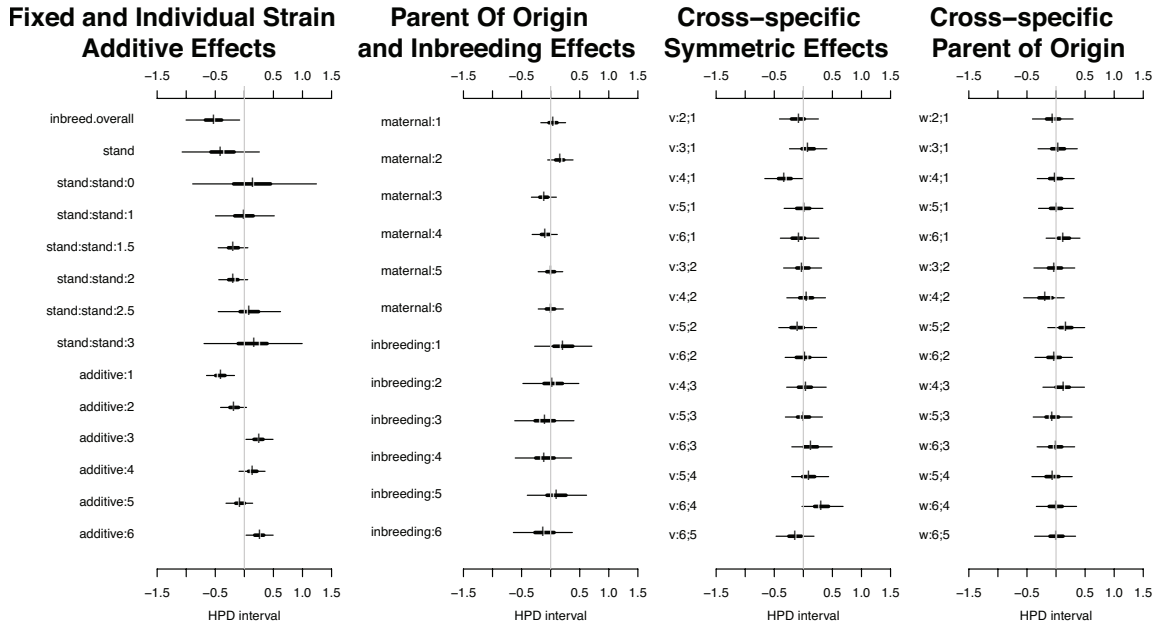

Figure S39: HPD intervals for dry shoot biomass (g).

### 8.4 HPD intervals for fixed and random effects

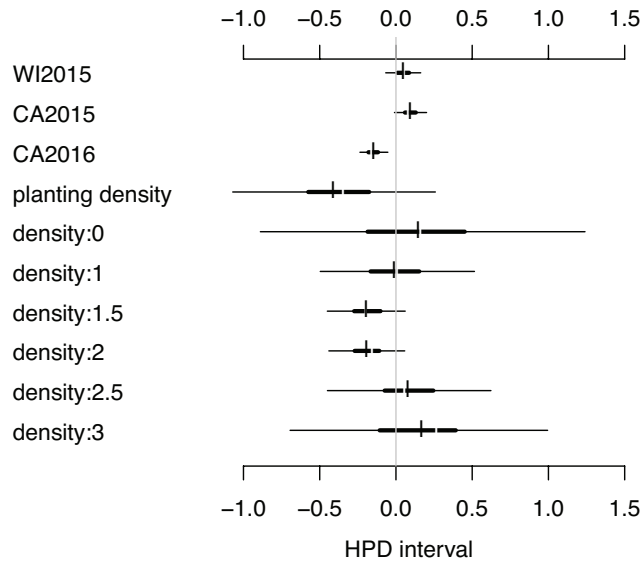

Figure S40: HPD intervals of fixed and random effects for dry shoot biomass (g). Planting density ranged from 0 (low) to 3 (high).

## 8.5 Degree of dominance

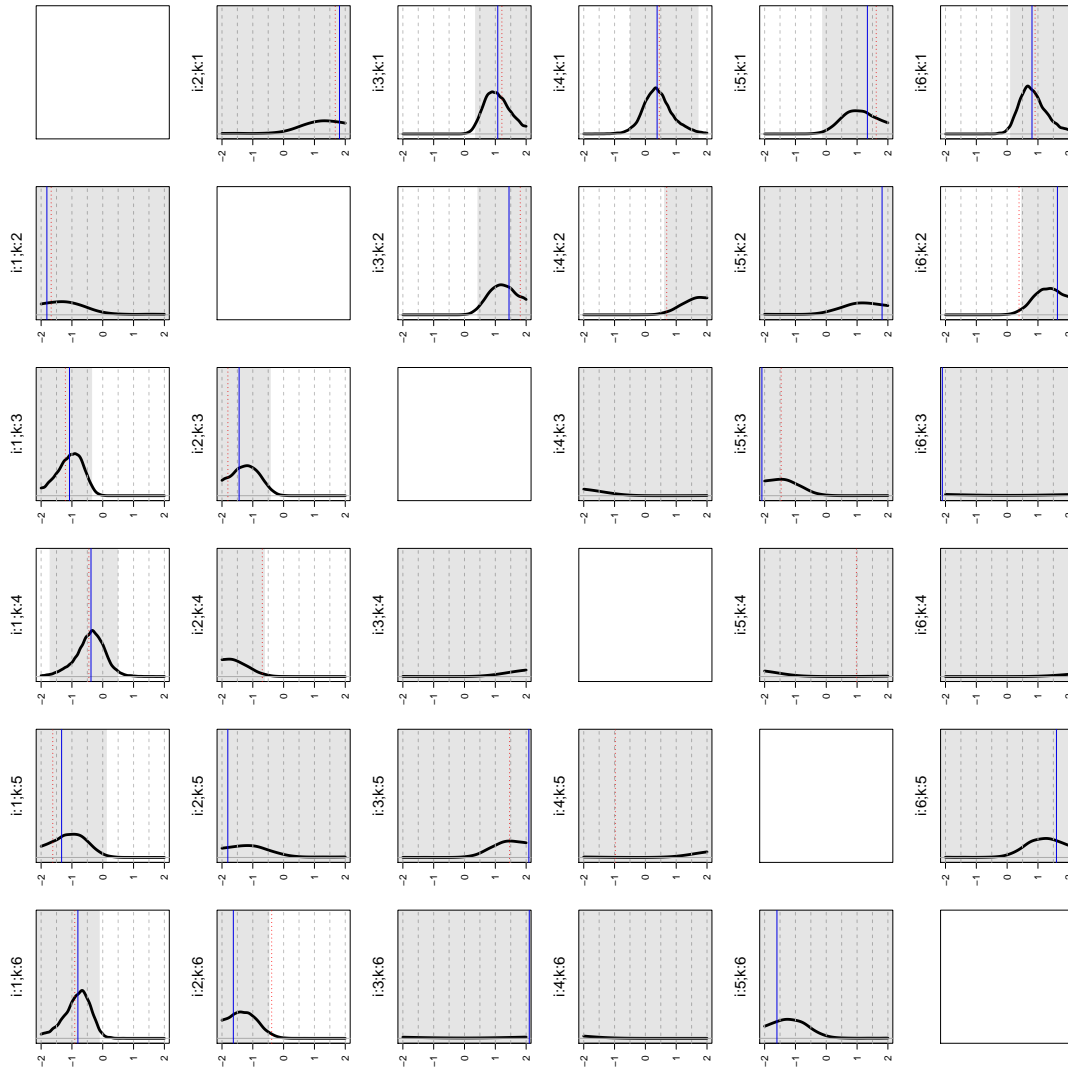

**Figure S41:** Posterior distributions of the degree of dominance for dry shoot biomass. Posterior means within the interval are indicated by red dotted lines and medians by blue solid lines, with 95% central quantiles shown in grey. A signal was considered strong if the mean, median, and the majority of the posterior distribution fell within the specified ranges: pseudo-underrecessive  $(-\infty, -1.5)$ , recessive  $(-1.5, -0.5)$ , additive  $(-0.5, 0.5)$ , dominant  $(0.5, 1.5)$ , pseudo-overdominant  $(1.5, \infty)$ . Key for parental lines: 1=L6038, 2=L7550, 3=P0159, 4=Nbh2189, 5=P6139, 6=B7262.

## 8.6 GxE

### 8.6.1 GCA x environment interactions

**Table S16:** GCA for dry shoot biomass (g) in each growing environment.

| Parent  | WI2015  | CA2015   | CA2016   |
|---------|---------|----------|----------|
| L6038   | -0.41** | -0.61*** | -0.56*** |
| L7550   | -0.14   | -0.03    | -0.28*   |
| P0159   | 0.43**  | 0.31*    | 0.43***  |
| Nbh2189 | -0.04   | 0.24     | 0.13     |
| P6139   | -0.12   | -0.3*    | -0.01    |
| B7262   | 0.29    | 0.4**    | 0.3*     |

\*\*\*P≤0.001, \*\*P≤0.01, \*P≤0.05

**Table S17:** Nonparametric correlations (Spearman's rho) among environments for GCA of dry shoot biomass (g).

| Environment   | Spearman's rho |
|---------------|----------------|
| WI2015-CA2015 | 0.89*          |
| WI2015-CA2016 | 1***           |
| CA2015-CA2016 | 0.89*          |

\*\*\*P≤0.001, \*\*P≤0.01, \*P≤0.05

## 8.6.2 SCA x environment interactions

**Table S18:** SCA for dry shoot biomass (g) in each growing environment.

| F1 hybrids      | WI2015 | CA2015  | CA2016  |
|-----------------|--------|---------|---------|
| L6038 x L7550   | 0.49*  | -0.14   | -0.04   |
| L6038 x P0159   | -0.02  | 0.17    | 0.22    |
| L6038 x Nbh2189 | 0.42   | -0.52*  | -0.61** |
| L6038 x P6139   | 0.17   | 0.25    | 0.23    |
| L6038 x B7262   | -0.23  | -0.04   | 0.08    |
| L7550 x P0159   | 0.15   | -0.08   | 0.22    |
| L7550 x Nbh2189 | 0.48   | 0.25    | 0.1     |
| L7550 x P6139   | -0.38  | 0.11    | 0.11    |
| L7550 x B7262   | 0.2    | 0.53*   | 0.24    |
| P0159 x Nbh2189 | 0.04   | 0.12    | 0.12    |
| P0159 x P6139   | -0.38  | 0.13    | -0.17   |
| P0159 x B7262   | -0.28  | -0.01   | -0.05   |
| Nbh2189 x P6139 | 0.43   | -0.14   | 0.21    |
| Nbh2189 x B7262 | 0.36   | 0.93*** | 0.32    |
| P6139 x B7262   | -0.24  | -0.35   | -0.08   |
| Parental selfs  |        |         |         |
| L6038           | -0.79* | 0.28    | 0.04    |
| L7550           | -0.34  | -0.67*  | -0.31   |
| P0159           | -0.63  | -0.32   | -0.32   |
| Nbh2189         | -0.64  | -0.64   | -0.13   |
| P6139           | -0.08  | 0.01    | -0.39   |
| B7262           | -0.86* | -1.06** | -0.5    |

\*\*\* $P \leq 0.001$ , \*\* $P \leq 0.01$ , \* $P \leq 0.05$

**Table S19:** Nonparametric correlations (Spearman's rho) among environments for SCA of dry shoot biomass (g).

| Environment   | Spearman's rho |
|---------------|----------------|
| WI2015-CA2015 | 0.30           |
| WI2015-CA2016 | 0.48*          |
| CA2015-CA2016 | 0.70**         |

\*\*\* $P \leq 0.001$ , \*\* $P \leq 0.01$ , \* $P \leq 0.05$

### 8.6.3 Rankings by environment

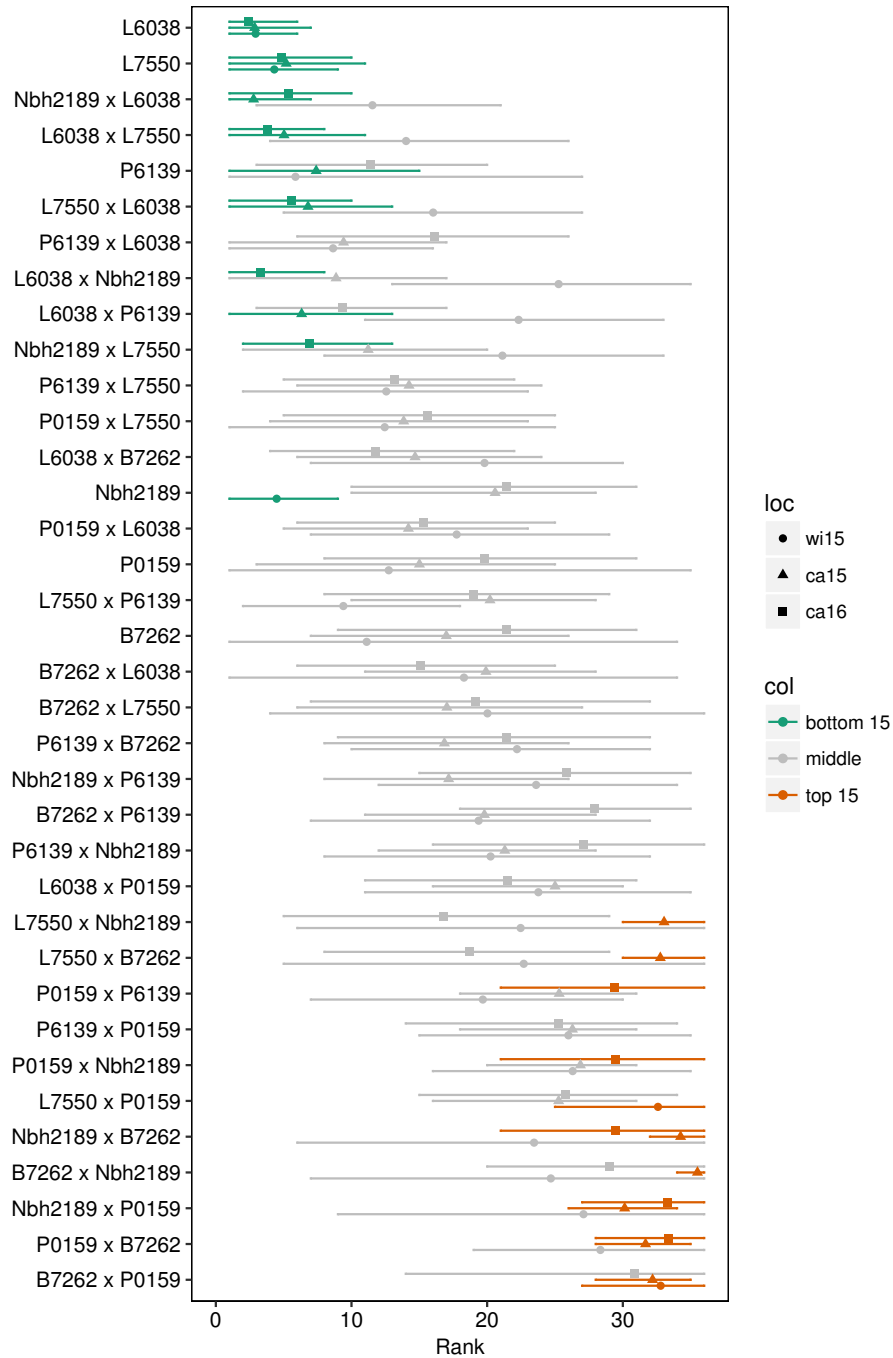

**Figure S42:** Mean values and 95% highest posterior density (HPD) intervals of hybrid rankings for dry shoot biomass (g; 130 DAP). Hybrids with intervals in the bottom 15 are shown in blue and hybrids with intervals in the top 15 are shown in red.

# 9. Root biomass (fresh)

## 9.1 GGE biplot

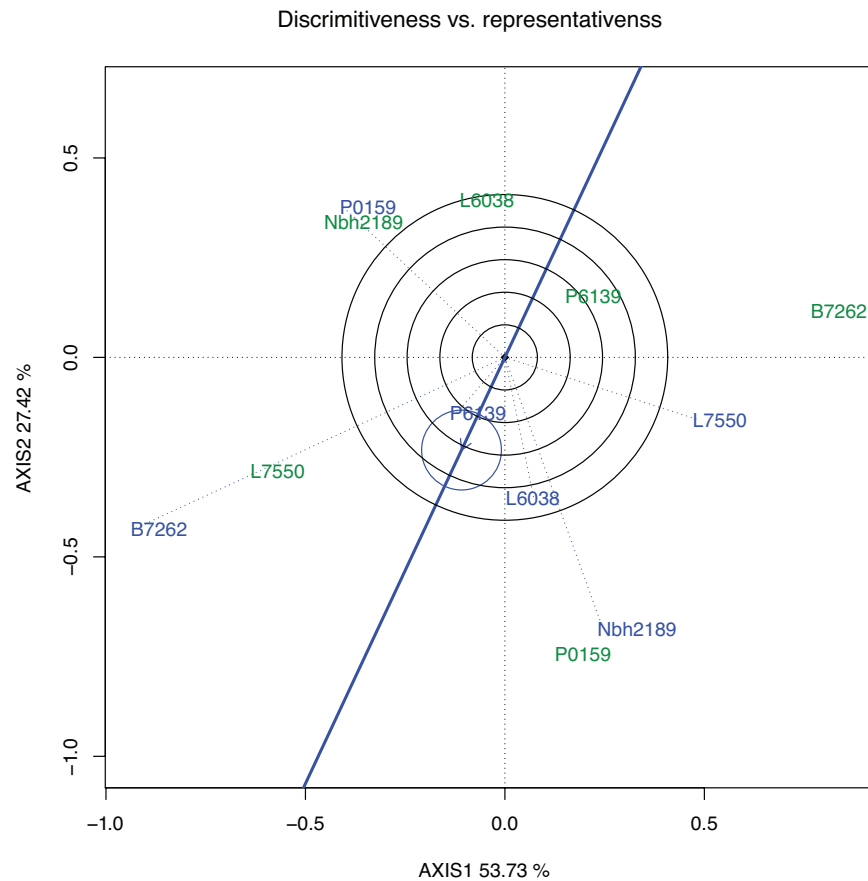

**Figure S43:** Discriminativens vs. representativens view of a biplot for fresh root biomass (measured 130 days after planting). Parents treated as testers are shown in blue and as entries in green. The blue line indicates the average tester coordinate (ATC) abscissa, with the blue circle indicating the average tester score. The arrow in the circle indicates the direction of increasing GCA for the entries. Parent Nbh2189 was both discriminating (had the longest vector) and was moderately representative of other parental lines (vector was close to the ATC abscissa), although parent P6139 was the most representative.



## 9.2 Observed and predicted values

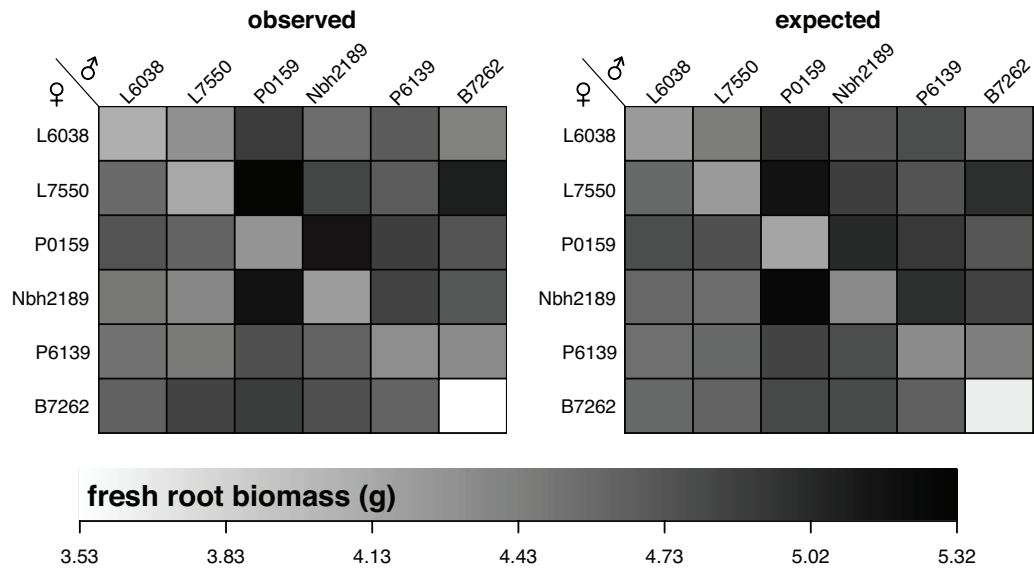

**Figure S44:** Observed (left) and predicted (right) means for root biomass (fresh; g). Posterior predicted means on the right are the result of fitting the model in BayesDiallel to the data on the left.

### 9.3 HPD intervals for inheritance classes

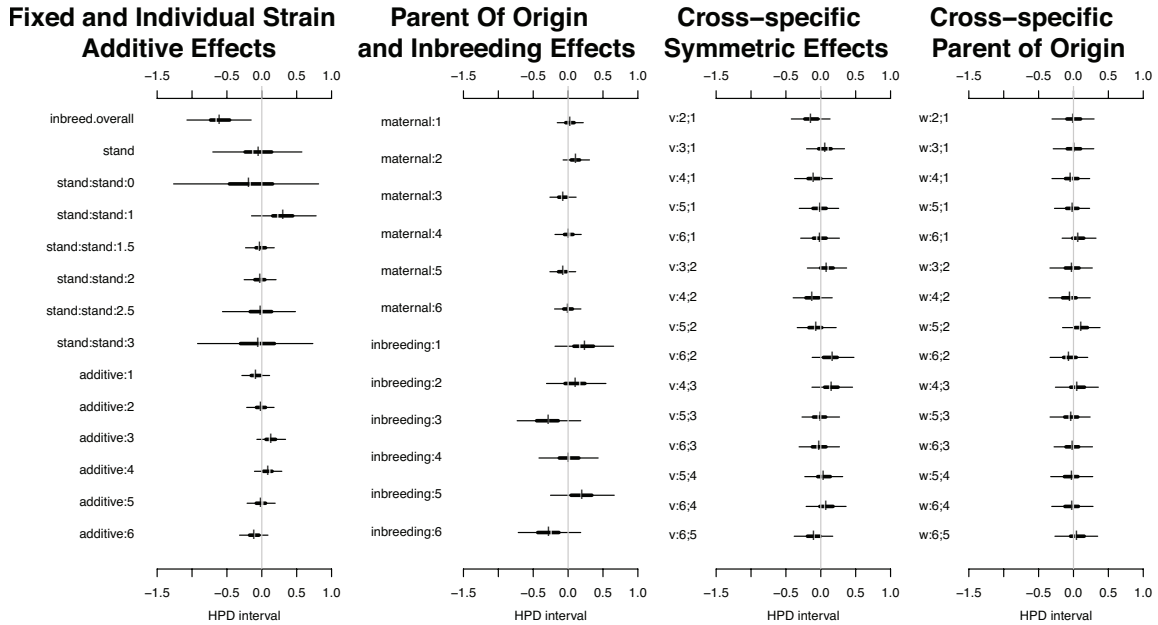

Figure S45: HPD intervals for fresh root biomass (g).

### 9.4 HPD intervals for fixed and random effects

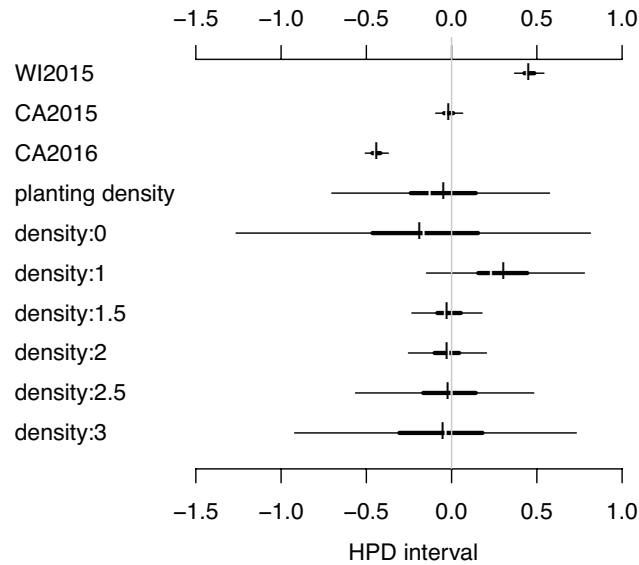

Figure S46: HPD intervals of fixed and random effects for fresh root biomass (g). Planting density ranged from 0 (low) to 3 (high).

## 9.5 Degree of dominance

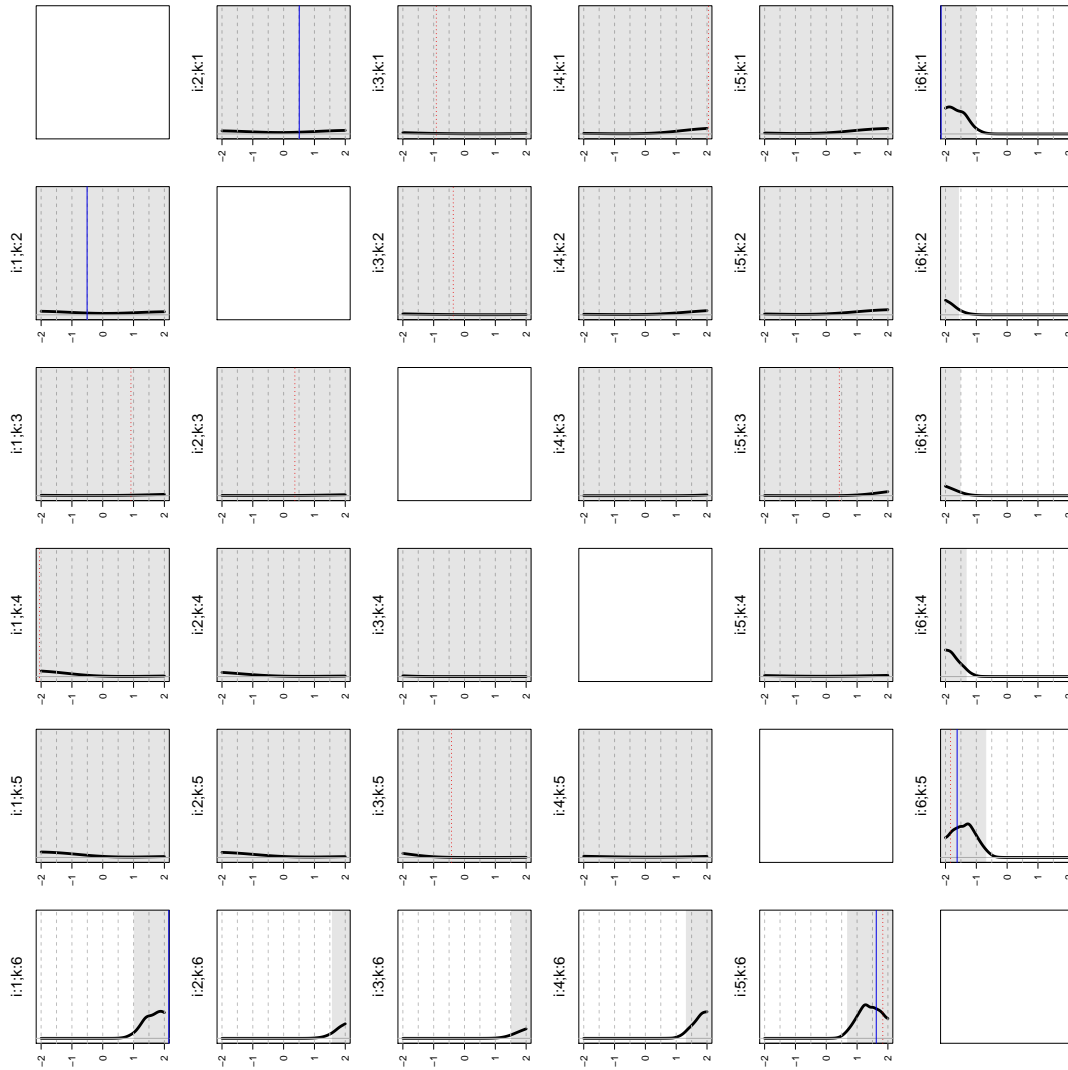

**Figure S47:** Posterior distributions of the degree of dominance for fresh root biomass. Posterior means within the interval are indicated by red dotted lines and medians by blue solid lines, with 95% central quantiles shown in grey. A signal was considered strong if the mean, median, and the majority of the posterior distribution fell within the specified ranges: pseudo-underrecessive  $(-\infty, -1.5)$ , recessive  $(-1.5, -0.5)$ , additive  $(-0.5, 0.5)$ , dominant  $(0.5, 1.5)$ , pseudo-overdominant  $(1.5, \infty)$ . Key for parental lines: 1=L6038, 2=L7550, 3=P0159, 4=Nbh2189, 5=P6139, 6=B7262.

## 9.6 GxE

### 9.6.1 Rankings by environment

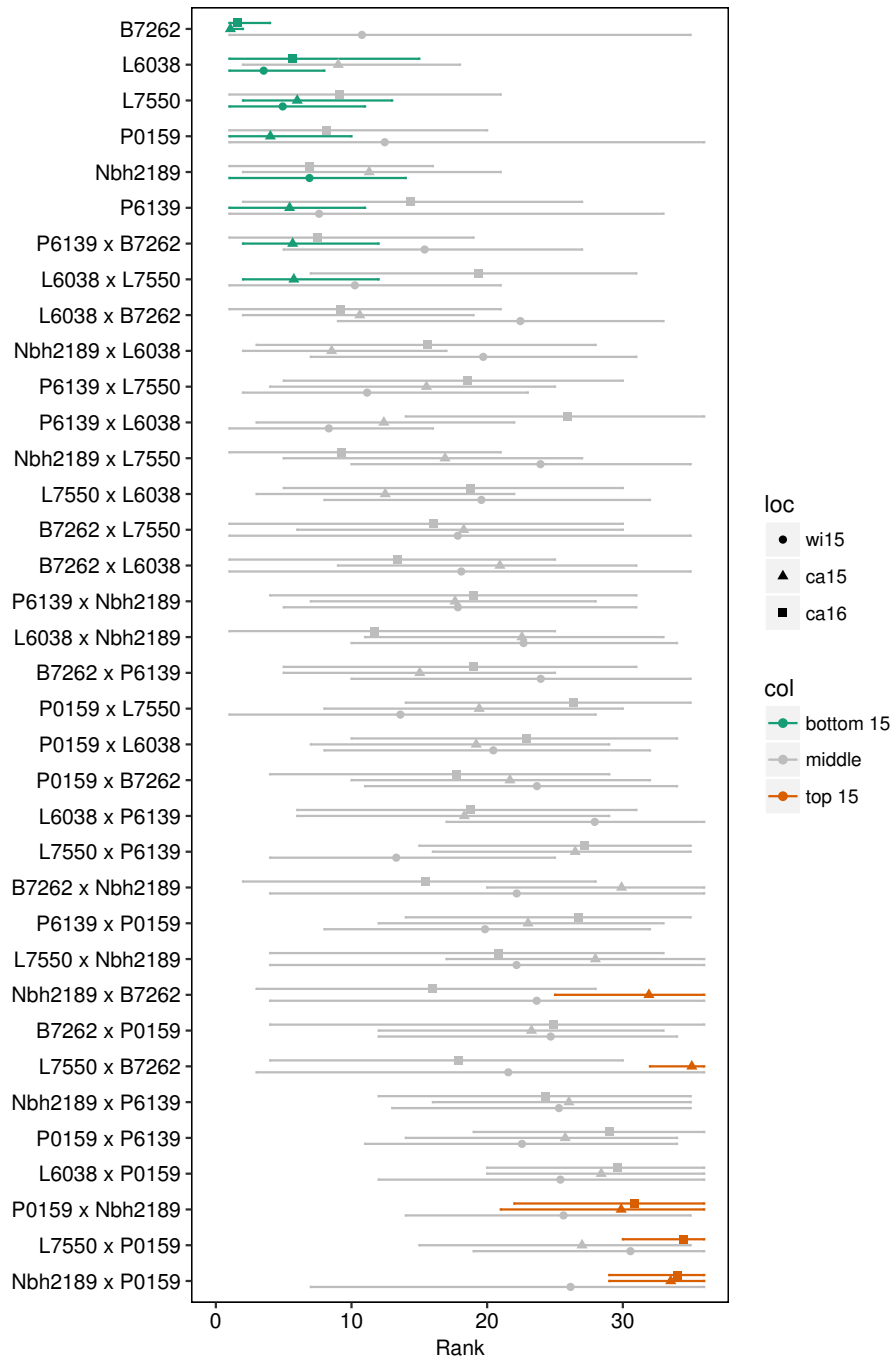

**Figure S48:** Mean values and 95% highest posterior density (HPD) intervals of hybrid rankings for fresh root biomass (g; 130 DAP). Hybrids with intervals in the bottom 15 are shown in blue and hybrids with intervals in the top 15 are in red.

# 10. Root biomass (dry)

## 10.1 GGE biplot

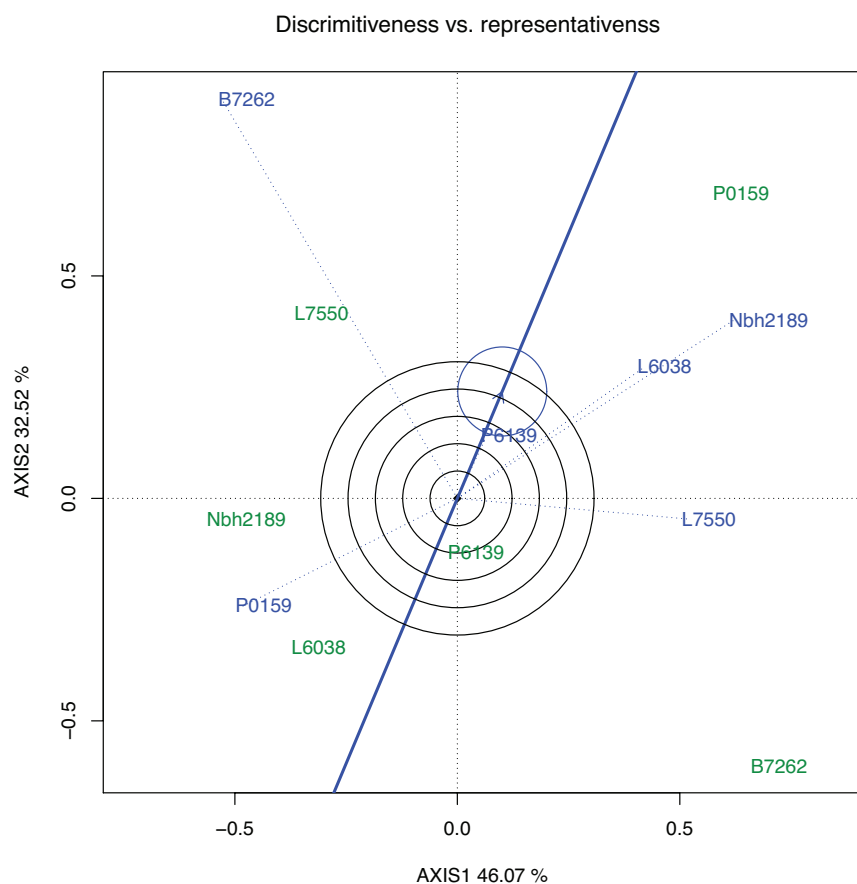

**Figure S49:** Discriminativens vs. representativens view of a biplot for dry root biomass (measured 130 days after planting). Parents treated as testers are shown in blue and as entries in green. The blue line indicates the average tester coordinate (ATC) abscissa, with the blue circle indicating the average tester score. The arrow in the circle indicates the direction of increasing GCA for the entries. Parent Nbh2189 was both discriminating (had the longest vector) and was moderately representative of other parental lines (vector was close to the ATC abscissa), although parent P6139 was the most representative.

## 10.2 Observed and predicted values

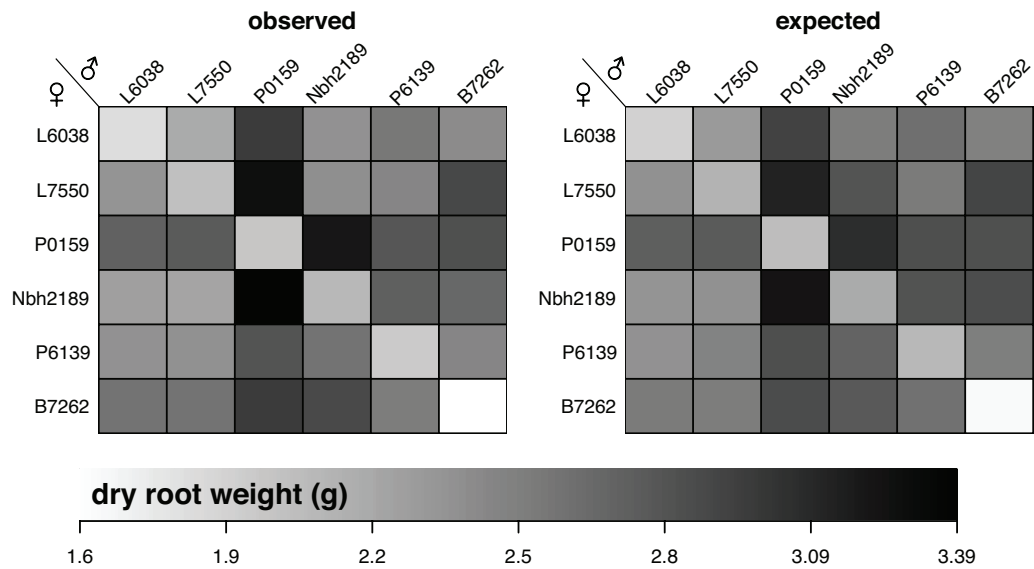

**Figure S50:** Observed (left) and predicted (right) means for dry root biomass (g). Posterior predicted means on the right are the result of fitting the model in BayesDiallel to the data on the left.

### 10.3 HPD intervals for inheritance classes

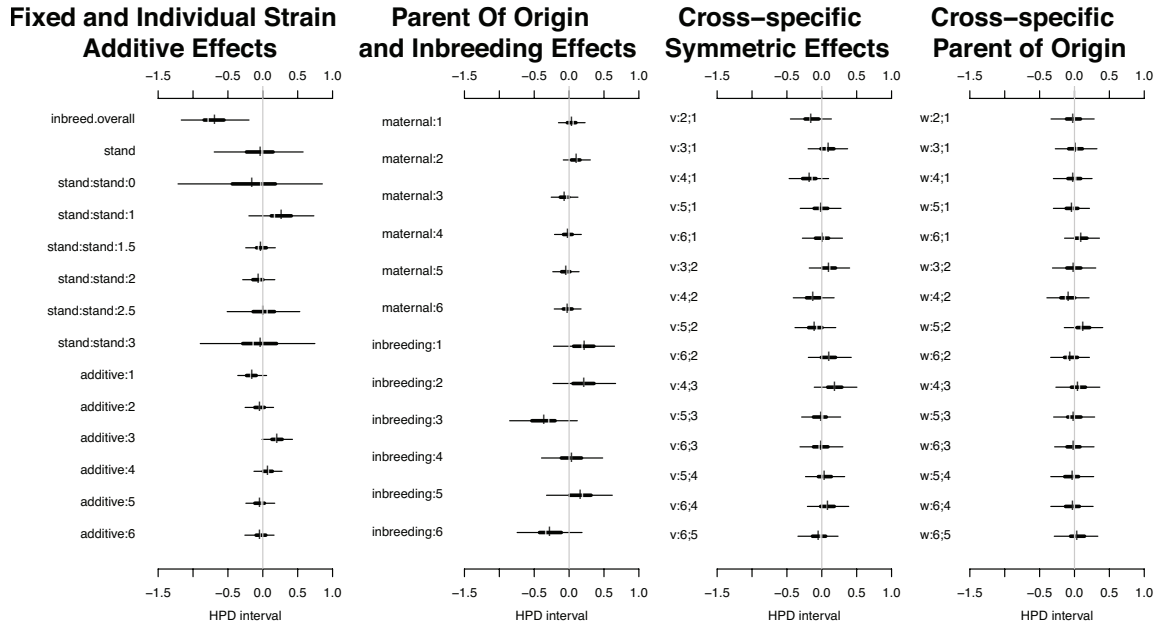

Figure S51: HPD intervals for dry root biomass (g).

### 10.4 HPD intervals for fixed and random effects

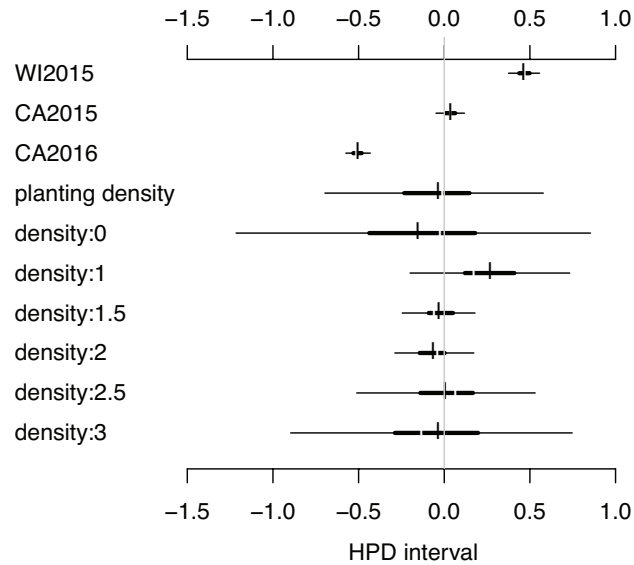

Figure S52: HPD intervals of fixed and random effects for dry root biomass (g). Planting density ranged from 0 (low) to 3 (high).

## 10.5 Degree of dominance

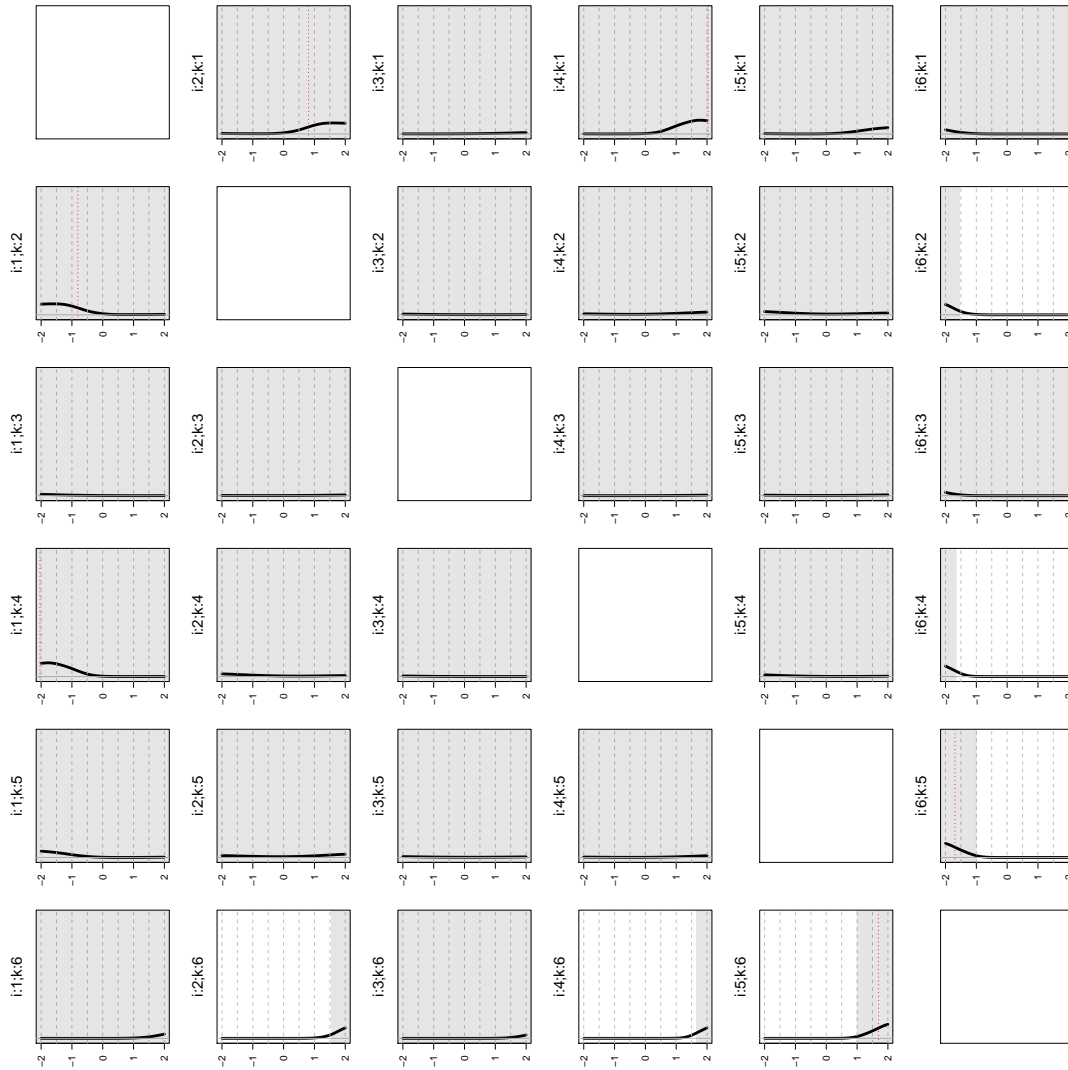

**Figure S53:** Posterior distributions of the degree of dominance for dry root biomass. Posterior means within the interval are indicated by red dotted lines and medians by blue solid lines, with 95% central quantiles shown in grey. A signal was considered strong if the mean, median, and the majority of the posterior distribution fell within the specified ranges: pseudo-underrecessive  $(-\infty, -1.5)$ , recessive  $(-1.5, -0.5)$ , additive  $(-0.5, 0.5)$ , dominant  $(0.5, 1.5)$ , pseudo-overdominant  $(1.5, \infty)$ . Key for parental lines: 1=L6038, 2=L7550, 3=P0159, 4=Nbh2189, 5=P6139, 6=B7262.



## 10.6 GxE

### 10.6.1 Rankings by environment



**Figure S54:** Mean values and 95% highest posterior density (HPD) intervals of hybrid rankings for dry root biomass (g; 130 DAP). Hybrids with intervals in the bottom 15 are shown in blue and hybrids with intervals in the top 15 are shown in red.

# 11. Shoot:root ratio

## 11.1 GGE biplot

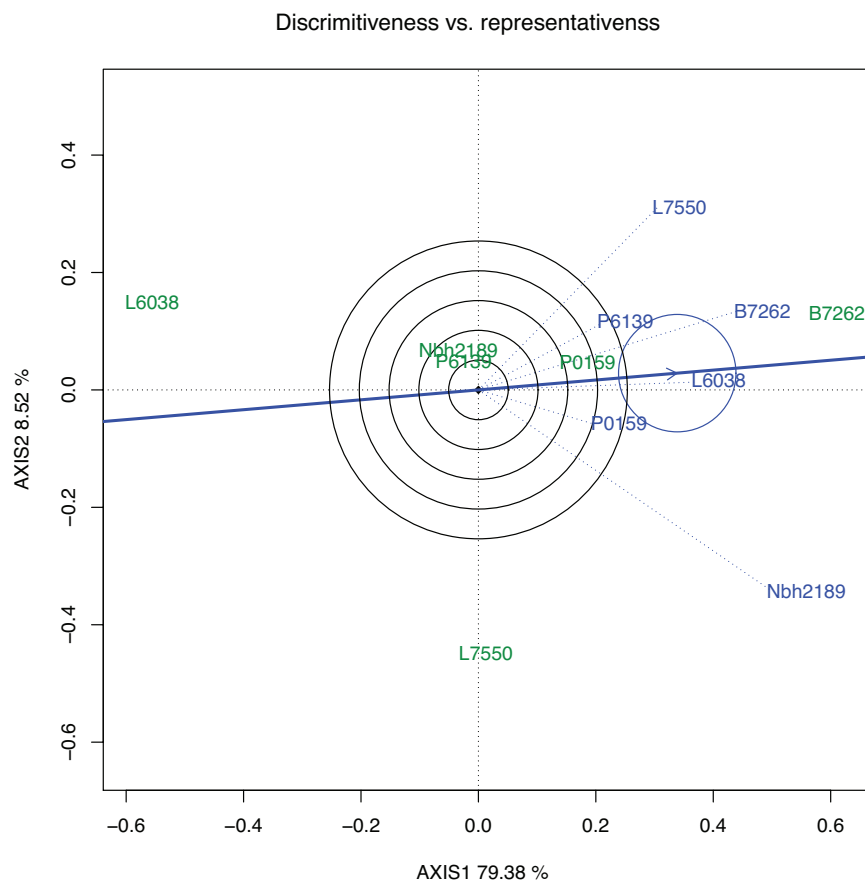

**Figure S55:** Discriminativens vs. representativens view of a biplot for shoot:root ratio (measured 130 days after planting). Parents treated as testers are shown in blue and as entries in green. The blue line indicates the average tester coordinate (ATC) abscissa, with the blue circle indicating the average tester score. The arrow in the circle indicates the direction of increasing GCA for the entries. Parent B7262 was the most discriminating, but parent L6038 was similarly discriminating and also the most representative of other parental lines (vector was close to the ATC abscissa).

## 11.2 Observed and predicted values

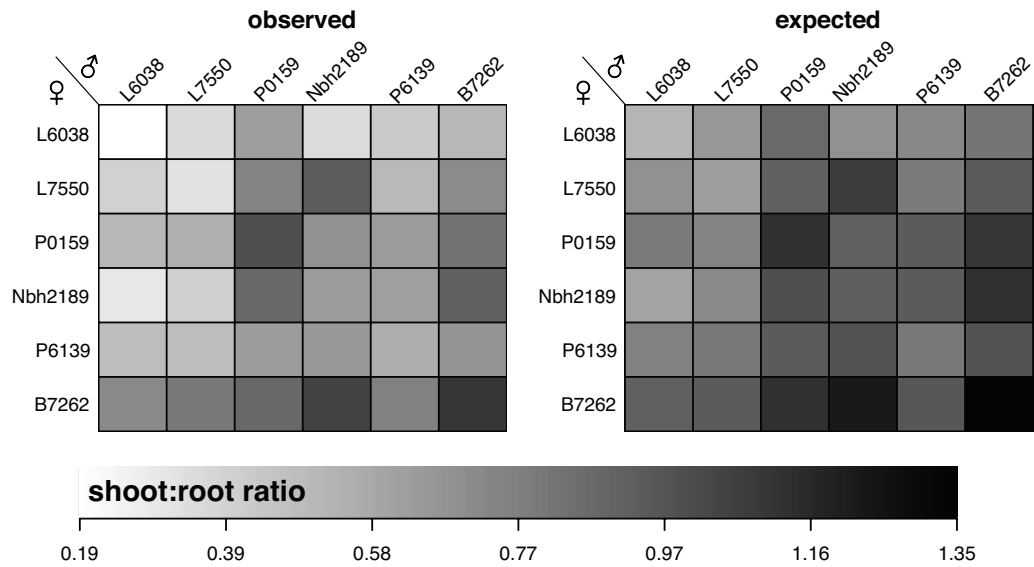

**Figure S56:** Observed (left) and predicted (right) means for shoot:root ratio. Posterior predicted means on the right are the result of fitting the model in BayesDiallel to the data on the left.

### 11.3 HPD intervals for inheritance classes

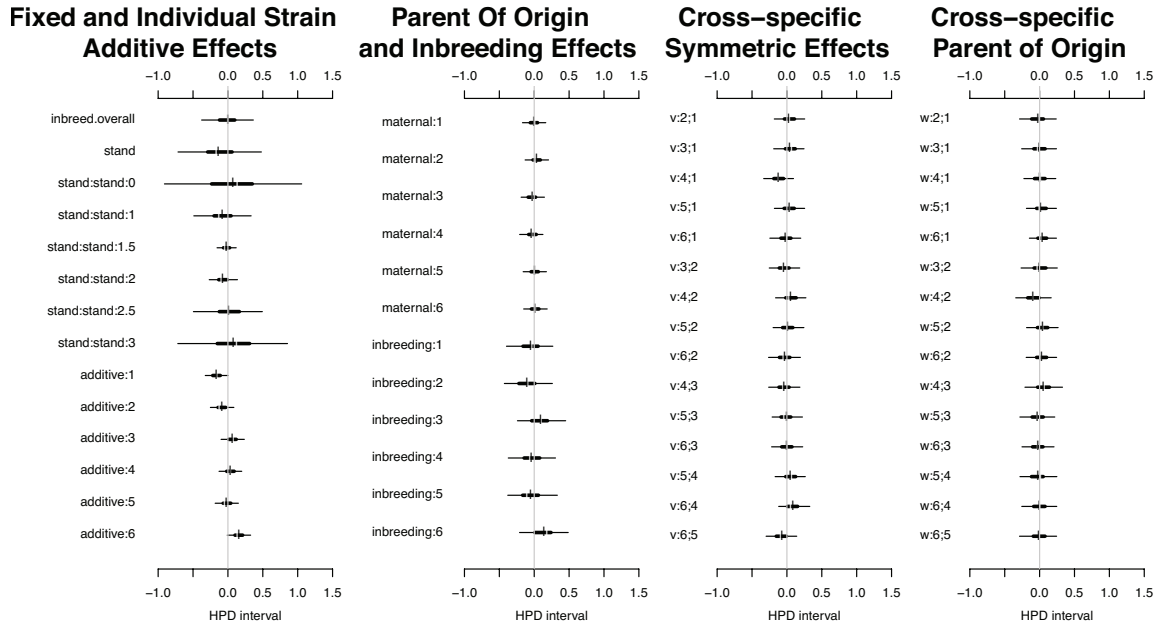

Figure S57: HPD intervals for shoot:root ratio.

### 11.4 HPD intervals for fixed and random effects

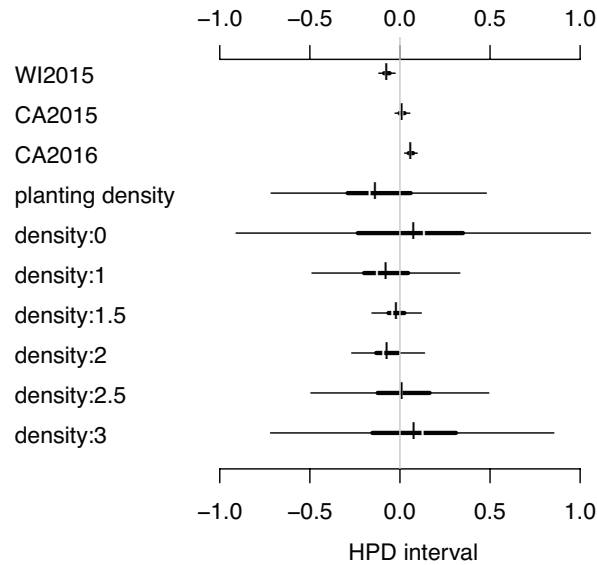

Figure S58: HPD intervals of fixed and random effects for shoot:root ratio. Planting density ranged from 0 (low) to 3 (high).

## 11.5 Degree of dominance

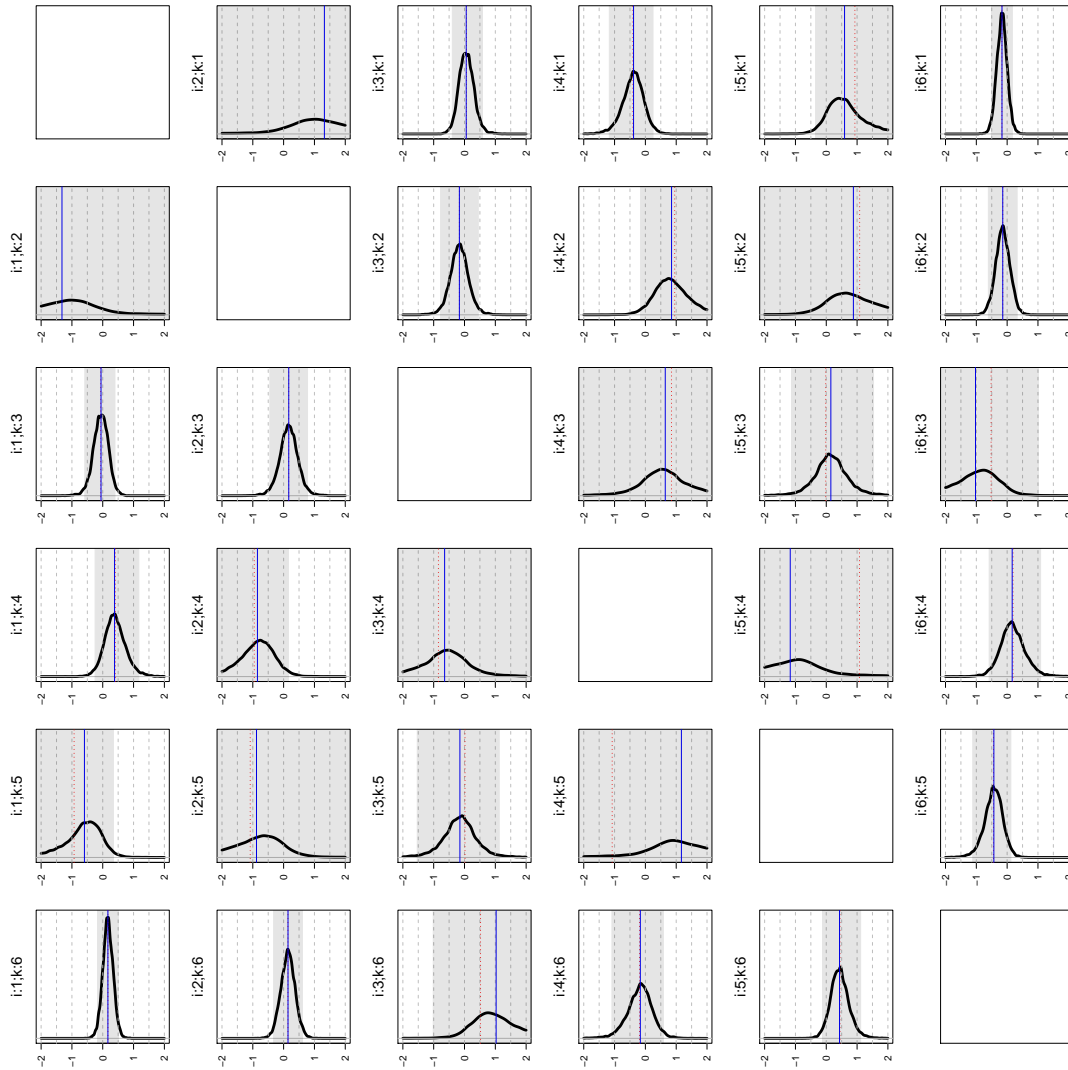

**Figure S59:** Posterior distributions of the degree of dominance for shoot:root ratio. Posterior means within the interval are indicated by red dotted lines and medians by blue solid lines, with 95% central quantiles shown in grey. A signal was considered strong if the mean, median, and the majority of the posterior distribution fell within the specified ranges: pseudo-underrecessive  $(-\infty, -1.5)$ , recessive  $(-1.5, -0.5)$ , additive  $(-0.5, 0.5)$ , dominant  $(0.5, 1.5)$ , pseudo-overdominant  $(1.5, \infty)$ . Key for parental lines: 1=L6038, 2=L7550, 3=P0159, 4=Nbh2189, 5=P6139, 6=B7262.

## 11.6 GxE

### 11.6.1 GCA x environment interactions

**Table S20:** GCA for shoot:root ratio in each growing environment.

| Parent  | WI2015  | CA2015   | CA2016   |
|---------|---------|----------|----------|
| L6038   | -0.12** | -0.19*** | -0.26*** |
| L7550   | -0.05   | -0.03    | -0.16**  |
| P0159   | 0.1*    | 0.08*    | 0.1*     |
| Nbh2189 | -0.02   | 0.04     | 0.06     |
| P6139   | -0.04   | -0.06    | 0.01     |
| B7262   | 0.14**  | 0.16***  | 0.25***  |

\*\*\*P≤0.001, \*\*P≤0.01, \*P≤0.05

**Table S21:** Nonparametric correlations (Spearman's rho) among environments for GCA of shoot:root ratio.

| Environment   | Spearman's rho |
|---------------|----------------|
| WI2015-CA2015 | 0.94**         |
| WI2015-CA2016 | 1***           |
| CA2015-CA2016 | 0.94**         |

\*\*\*P≤0.001, \*\*P≤0.01, \*P≤0.05

### 11.6.2 SCA x environment interactions

**Table S22:** SCA for shoot:root ratio (g) in each growing environment.

| F1 hybrids      | WI2015  | CA2015 | CA2016   |
|-----------------|---------|--------|----------|
| L6038 x L7550   | 0.14*   | 0      | 0.03     |
| L6038 x P0159   | 0       | 0.04   | 0.1      |
| L6038 x Nbh2189 | 0.13    | -0.15* | -0.28*** |
| L6038 x P6139   | 0.07    | 0.04   | 0.07     |
| L6038 x B7262   | -0.05   | -0.02  | -0.05    |
| L7550 x P0159   | 0.01    | -0.06  | 0.01     |
| L7550 x Nbh2189 | 0.14    | 0.1    | 0.03     |
| L7550 x P6139   | -0.1    | 0.04   | 0.09     |
| L7550 x B7262   | -0.02   | 0.03   | 0        |
| P0159 x Nbh2189 | -0.01   | -0.04  | -0.09    |
| P0159 x P6139   | -0.09   | 0.01   | -0.08    |
| P0159 x B7262   | -0.06   | -0.02  | -0.15    |
| Nbh2189 x P6139 | 0.11    | -0.02  | 0.05     |
| Nbh2189 x B7262 | 0.09    | 0.16*  | -0.02    |
| P6139 x B7262   | -0.07   | -0.13  | -0.08    |
| P6139 x B7262   | -0.19   | -0.37  | -0.03    |
| Parental selfs  |         |        |          |
| L6038           | -0.27** | 0.09   | 0.08     |
| L7550           | -0.09   | -0.11  | -0.05    |
| P0159           | 0.03    | 0.07   | 0.2*     |
| Nbh2189         | -0.18   | -0.04  | 0.27**   |
| P6139           | 0.02    | 0.05   | -0.09    |
| B7262           | 0.07    | -0.02  | 0.11     |

\*\*\*P $\leq$ 0.001, \*\*P $\leq$ 0.01, \*P $\leq$ 0.05

**Table S23:** Nonparametric correlations (Spearman's rho) among environments for SCA of shoot:root ratio.

| Environment   | Spearman's rho |
|---------------|----------------|
| WI2015-CA2015 | 0.19           |
| WI2015-CA2016 | -0.03          |
| CA2015-CA2016 | 0.37           |

\*\*\*P $\leq$ 0.001, \*\*P $\leq$ 0.01, \*P $\leq$ 0.05

### 11.6.3 Rankings by environment

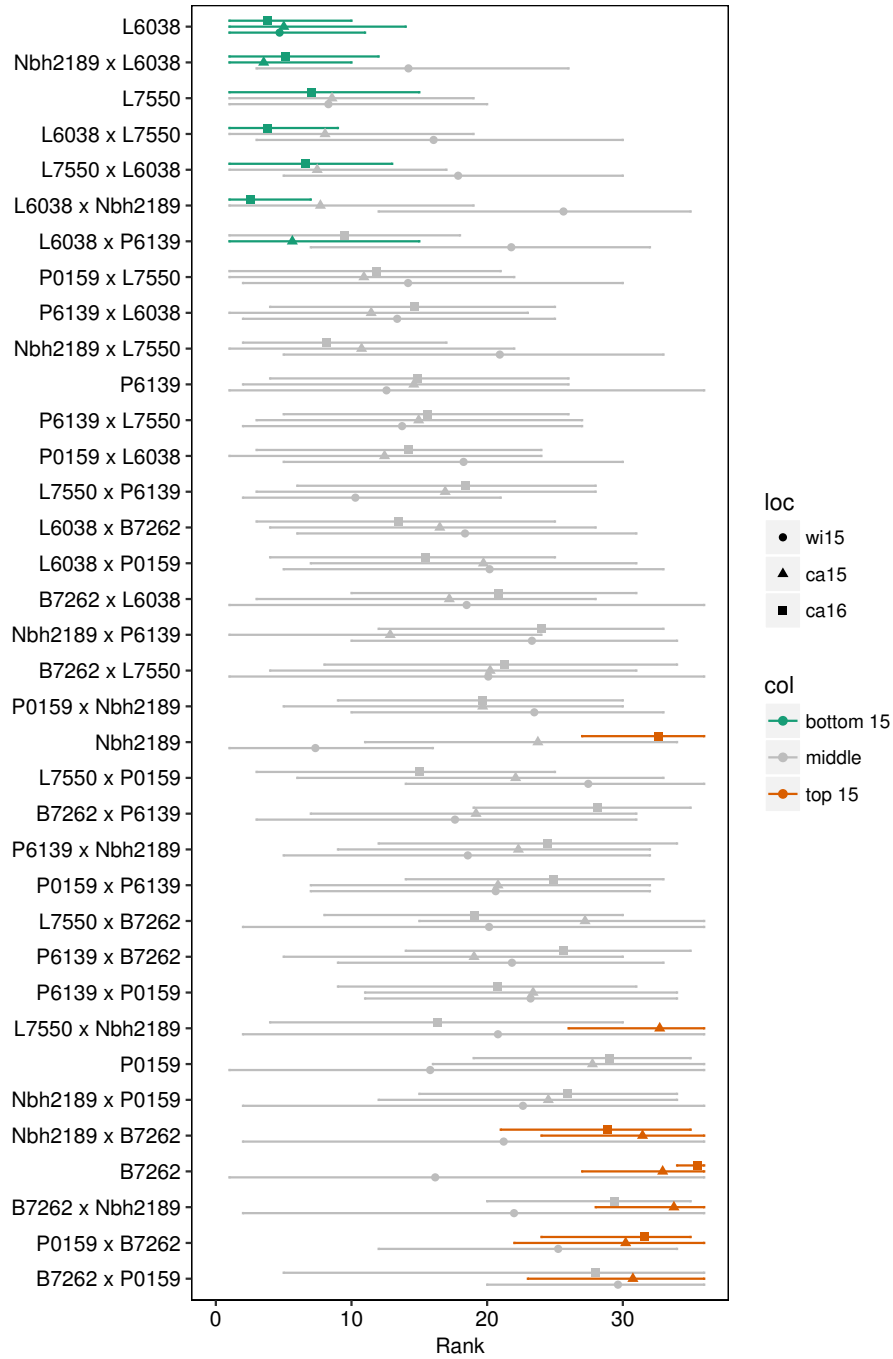

**Figure S60:** Mean values and 95% highest posterior density (HPD) intervals of hybrid rankings for shoot:root ratio (130 DAP). Hybrids with intervals in the bottom 15 are shown in blue and hybrids with intervals in the top 15 are shown in red.
